1  
2 **Differentiation genes were governed by DNA methylation during hair follicle**  
3 **morphogenesis in Cashmere goat**

4  
5 Shanhe Wang<sup>1,2†</sup>, Fang Li<sup>1†</sup>, Jinwang Liu<sup>3</sup> Yuelang Zhang<sup>1</sup>, Yujie Zheng<sup>1</sup>, Wei  
6 Ge<sup>1</sup>, Lei Qu<sup>3\*</sup> and Xin Wang<sup>1\*</sup>

7 <sup>1</sup> College of Animal Science & Technology, Northwest A&F University, Yangling,  
8 Shaanxi 712100, China

9 <sup>2</sup> College of Animal Science & Technology, Yangzhou University, Yangzhou,  
10 Jiangsu 225000, China

11 <sup>3</sup> College of Life Science, Yulin University, Yulin, Shaanxi 712100, China;  
12 ljw\_yl@163.com (J.L.), ylqulei@126.com (L.Q.)

13 † These authors contributed equally to this work.

14  
15 \* Correspondence: ylqulei@126.com (L.Q.) and wxwza@126.com (X.W.)

16 **Short title**

17 DNA methylation control hair follicle morphogenesis.

18 **Abstract**

19 DNA methylation plays a critical role in early embryonic skin development by  
20 controlling gene expression. Act as an indirect regulator, long non-coding RNA  
21 (lncRNA) recruit DNA methyltransferases to specific genomic sites to methylate  
22 DNA. However, the molecular regulation mechanisms underlying hair follicle  
23 morphogenesis is unclear in cashmere goat. In this study, RNA-seq and  
24 Whole-genome bisulfite sequencing (WGBS) in embryonic day 65 (E65) and E120  
25 skin tissues of cashmere goat were used to reveal this complex regulatory process.  
26 RNA-seq, qRT-PCR and immunohistochemistry results showed that Wnt signaling  
27 played an important role in both hair follicle induction and differentiation stage,  
28 transcriptional factors (TFs) including Hoxc13, Sox9, Sox21, Junb, Lhx2, Vdr and  
29 Gata3 participated in hair follicle differentiation via specific expression at E120.  
30 Subsequently, combination of WGBS and RNA-seq analysis showed that the  
31 expression of hair follicle differentiation genes and TFs genes was negatively  
32 correlated with DNA methylation level generally. A portion of hair follicle  
33 differentiation genes were methylated and repressed in hair follicle induction stage  
34 but were subsequently demethylated and expressed during hair follicle  
35 differentiation stage, suggesting DNA methylation play an important role in hair  
36 morphogenesis through regulating associated gene expression. Furthermore, the  
37 potential differentially expressed lncRNAs associated with DNA methylation on  
38 target gene were revealed. LncRNA XR\_001918556 may affect the DNA  
39 methylation of TFs gene *Gata3*, lnc-003786 may affect the DNA methylation of  
40 signaling gene *Fgfr2*. In conclusion, differentiation genes were governed by DNA  
41 methylation, resulting in repressed expression in hair follicle induction stage and  
42 high expression in hair follicle differentiation stage. Furtherly, potential lncRNAs  
43 associated with DNA methylation on target genes were delineated. This study  
44 would enrich the regulatory network and molecular mechanisms on hair  
45 morphogenesis.

46 **Keywords:** hair follicle morphogenesis; differentiation; DNA methylation; lncRNA;  
47 cashmere goat; Wnt signaling

## 48 **Introduction**

49 Hair is a primary characteristic of mammals, and exerts a wide range of functions  
50 including thermoregulation, physical protection, sensory activity, and social  
51 interactions (Paus and Cotsarelis, 1999; Schneider et al., 2009). Cashmere is  
52 upmarket textile material produced by the secondary hair follicle with high economic  
53 values (Ge et al., 2018; Wang et al., 2017). As the number and quality of cashmere  
54 depend on cashmere morphogenesis, it is therefore of great value to dissect the  
55 critical genes, signaling pathways and their regulatory machinery underlying hair  
56 follicle morphogenesis in cashmere goat.

57  
58 Hair follicle morphogenesis takes place during embryonic skin development, which  
59 relies on tightly coordinated ectodermal–mesodermal interactions (Biggs and  
60 Mikkola, 2014; Botchkarev and Kishimoto, 2003; Millar, 2002; Schmidt-Ullrich and  
61 Paus, 2005). Researches in mice showed that hair follicle morphogenesis is  
62 initiated after secreted epidermal Wnts activating broad dermal Wnt signaling (Chen  
63 et al., 2012), which in turn through unknown dermal signaling and subsequent Wnt,  
64 Eda and FGF20 epidermal downstream signaling, leads to hair placode (Pc)  
65 induction in epidermis (Lee and Tumber, 2012; Schneider et al., 2009; Wang et al.,  
66 2012) and dermal condensate (DC) formation below (Huh et al., 2013; Mok et al.,  
67 2019). Following the induction stage, hair follicle enter organogenesis and  
68 subsequent cytodifferentiation stage, in which Pc cells give rise to all the epithelial  
69 components of full-developed hair follicle including outer root sheath, inner root  
70 sheath, hair matrix, hair shaft and hair follicle stem cell, while the DC cells will  
71 develop into the follicular dermal papilla and connective tissue sheath (Asakawa et  
72 al., 2017; Avigad Laron et al., 2018; Mesler et al., 2017). A number of molecules  
73 and their interactions in each phase that play a role in hair follicle development have  
74 been identified using transgenic mice model and hair follicle regeneration assay  
75 (Bak et al., 2018; Glover et al., 2017; Nakamura et al., 2013). However, the unique  
76 molecular features of specific cell type and the regulatory relationships between  
77 signaling pathways involved in these processes are largely unknown (Sennett et al.,  
78 2015), especially in cashmere.

79  
80 Hair follicle morphogenesis results from the process of temporal-spatial expression  
81 of genes under the control of genetic and epigenetics, while DNA methylation has  
82 been shown to be implicated in the regulation of cell- or tissue-specific gene  
83 expression during embryogenesis (Michael et al., 2007; Reik and Dean, 2001).  
84 DNA methylation undergoes dynamic remodeling during early embryogenesis to  
85 initially establish a globally demethylated state and then subsequently, a  
86 progressively lineage-specific methylome that maintains cellular identity and  
87 genomic stability (Baubec and Schubeler, 2014; Senner, 2011). As development  
88 and differentiation proceed, differentiated cells accumulate epigenetic marks that  
89 differ from those of pluripotent cells, and differentiated cells of different lineages  
90 also accumulate different marks (Bock et al., 2012; Feng et al., 2010; Suzuki and  
91 Bird, 2008). However, it is still unknown about the function of DNA methylation in  
92 regulating cell lineage specification during hair morphogenesis.

93  
94 DNA methyltransferases (DNMTs) involved in DNA methylation lack  
95 sequence-specific DNA binding motifs, while many lncRNAs have DNA- and

96 protein-binding motifs, allowing them to carry DNMTs to specific genomic sites  
97 (Carlson et al., 2015; Mohammad et al., 2012). Emerging data indicate that  
98 lncRNAs function as guides and tethers, and may be the molecules of choice for  
99 epigenetic regulation (Chen et al., 2019). Meanwhile, previous studies revealed that  
100 lncRNA regulates hair follicle stem cell proliferation and differentiation (Cai et al.,  
101 2018). However, whether lncRNA mediate DNA methylation and contribute to hair  
102 morphogenesis in cashmere goat is unknown.

103

104 To investigate the molecular identity and regulatory mechanism underlying hair  
105 morphogenesis in cashmere goat, RNA-seq was conducted on skin samples at hair  
106 follicle induction and differentiation stages from E 65 and E 120, we composed a  
107 molecular snapshot of an entire tissue, and uncovered genes in cell-type-specific  
108 signatures through transcriptome cross-comparisons with mice. Furthermore,  
109 genome-wide DNA methylation profiles between skin tissues in E 65 and E 120  
110 were investigated using WGBS. Through integrated analysis of mRNA and lncRNA  
111 transcriptome with WGBS data, the regulation of DNA methylation on hair induction  
112 and differentiation and the potential lncRNAs involved in DNA methylation to take  
113 part in hair morphogenesis have been delineated. Our work would enrich the  
114 underlying molecular mechanisms of hair follicle morphogenesis and skin  
115 development.

## 116 **Materials and Methods**

### 117 ***Animals***

118 Shanbei White Cashmere goats with fine fiber production trait were used in this  
119 study. All the goats were obtained from Shanbei cashmere goats engineering  
120 technology research center of Shaanxi province, China. The experimental animals  
121 were fed according to the local cashmere goat standard of Shaanxi  
122 (DB61/T583-2013, <http://www.sxny.gov.cn/>). According previous morphology  
123 studies on hair morphogenesis of cashmere goat, in which hair follicle induction  
124 initiated around E 65 and hair follicle differentiation thrived around E 120, six  
125 pregnant Shanbei White Cashmere goats (two years old, weighing 30 - 40 kg) were  
126 selected to obtain fetal skin samples at E 65 and E 120 (n=3). Each time point had  
127 three replicates. After intravenous injection of Rompun (0.3 mg/kg) to anesthesia,  
128 six fetuses were delivered from six different females by caesarean operation. Skin  
129 samples were collected from the right mid-side of the fetuses, rinsed in ice-cold  
130 DEPC-treated water and cut into small pieces. At the same time, other tissues  
131 including muscle, adipose, heart, liver, spleen, lungs, kidney, duodenum and gonad  
132 were collected. Every tissue sample was divided into two parts; one was fixed with 4  
133 % paraformaldehyde and another one was frozen in sample protector for RNA/DNA  
134 (Takara, China) and stored at -80 °C for subsequent analysis. The carcasses were  
135 frozen to designated location waiting bio-safety disposal.

136

137 All the experimental procedures with goats used in the present study had been  
138 given prior approval by the Experimental Animal Manage Committee of Northwest  
139 A&F University (2011-31101684). All the operations and experimental procedures  
140 were complied with the national standard of Laboratory Animal-Guideline for Ethical  
141 Review of Animal Welfare (GB/T 35892-2018) and Guide for the Care and Use of  
142 Laboratory Animals: Eighth Edition (Council, 2011).

### 143 ***Transcriptome sequencing and bioinformatics analysis***

144 To obtain a transcriptome reference between E 65 and E 120, total RNA was  
145 extracted from the collected skin and other tissues. The RNA concentration and  
146 quality were determined using the Agilent 2100 Bioanalyzer (Agilent Technologies,  
147 USA). RNA-seq was performed as previously described (Li et al., 2018). We used  
148 the skin RNA samples to construct RNA-seq libraries from E 65 and E 120. Clean  
149 data were obtained by trimming reads containing adapter, reads containing over 10  
150 % of ploy-N, and low-quality reads (> 50 % of bases whose Phred scores were < 20)  
151 from the raw data. Then all subsequent analysis was based on the high-quality data.  
152 Then, the high quality reads were mapped to the goat genome v2.0  
153 ([ftp://ftp.ncbi.nlm.nih.gov/genomes/all/GCA/000/317/765/GCA\\_000317765.2\\_CHIR\\_2.0](ftp://ftp.ncbi.nlm.nih.gov/genomes/all/GCA/000/317/765/GCA_000317765.2_CHIR_2.0))  
154 using Bowtie v2.0.6 (Langmead et al., 2009) and the mapped reads for each  
155 sample were assembled using Cufflinks (v2.2.1). The differential expression  
156 changes were calculated for the pairwise comparison between E 65 and E 120 skin  
157 tissues, transcripts or genes with a  $P$ -adjust  $\leq 0.05$  (Storey, 2003) and fold change  $\geq$   
158 2 were described as differentially expressed. To explore the function of lncRNAs,  
159 we predicted the target genes of lncRNAs in *cis* and *trans*. And pearson's  
160 correlation coefficients were calculated between expression levels of lncRNAs and  
161 mRNAs with custom scripts (Pearson correlation  $\geq 0.95$  or  $\leq -0.95$ ).

162  
163 Gene Ontology (GO) enrichment analysis of differentially expressed genes was  
164 implemented using Gene Ontology Consortium (<http://www.geneontology.org/>)  
165 (Chibucos, 2015). Gene ontology terms with corrected  $P$  value less than 0.05 were  
166 considered significantly enriched by differentially expressed genes. Pathway  
167 analysis was used to identify significant pathways for the differentially expressed  
168 genes according to the Kyoto Encyclopedia of Genes and Genomes (KEGG)  
169 (<http://www.genome.jp/kegg/>) (Kanehisa et al., 2008). We used KOBAS software  
170 (main parameter: blastx 1e-10; padjust: BH) to test the statistical enrichment of  
171 differentially expressed genes in KEGG pathways (Mao et al., 2005).

### 172 **Quantitative Real-time PCR (qRT-PCR)**

173 The first-strand cDNA was obtained using a PrimeScript™ RT reagent Kit with  
174 gDNA Eraser (TAKARA, China), and then were subjected to quantification of the  
175 mRNAs with  $\beta$ -actin as an endogenous control on the Bio-Rad CFX96 Touch™  
176 Real Time PCR Detection System (Bio-Rad, USA). The qRT-PCR reaction  
177 consisted of 10  $\mu$ L 2  $\times$ SYBR® *Premix Ex Taq*™ II (TAKARA, China), 0.8  $\mu$ L specific  
178 forward/reverse primer (10 $\mu$ M), 1  $\mu$ L cDNA, and ddH<sub>2</sub>O to a final volume of 20  $\mu$ L.  
179 The qRT-PCR was performed using the following conditions: 95 °C for 60 s, 40  
180 cycles of 95 °C for 10 s, and the optimized annealing temperature for 30 s.  
181 Semi-quantitative RT-PCR was performed on 2720 thermal cycler (Applies  
182 biosystems) machine using ES Taq master mix (Cwbio, China). Primers used were  
183 provided in Table S1.

184  
185 Differences between samples at E 65 and E 120 (n=3) were calculated based on  
186 the  $2^{-\Delta\Delta C_t}$  method and normalized to  $\beta$ -actin. Measurements were recorded in  
187 duplicate. Differences in gene expression between the groups were detected by  
188 independent sample  $t$ -test.

### 189 **Histology and immunohistochemistry (IHC)**

190 Skin samples from E65 and E120 were fixed with 4 % paraformaldehyde, followed  
191 by dehydration further embedded in paraffin and cut into 5  $\mu$ m sections with a  
192 microtome (Leica RM2255, Nussloch, Germany). Sections were rehydrated,

193 blocked with 10 % goat serum and 3 % bovine serum albumin (Sigma, USA), and  
194 incubated 40 min at room temperature. Primary antibody against interest protein  
195 was then incubated with the samples at 4 °C overnight. Primary antibodies used  
196 were: Bmp2 (Abcam, Cat. No. ab214821, rabbit 1:200), Sox9 (Abcam, Cat. No.  
197 ab185966, rabbit 1:200), Vdr (Proteintech, Cat. No. 14526-1-AP, rabbit 1:150),  
198 Sox2 (Proteintech, Cat. No. 11064-1-AP, rabbit 1:150), Bmp4 (Proteintech, Cat. No.  
199 12492-1-AP, rabbit 1:150),  $\beta$ -catenin (Proteintech, Cat. No. 51067-2-AP, rabbit  
200 1:150), Wls (Proteintech, Cat. No. 17950-1-AP, rabbit 1:100), Fzd10 (Proteintech,  
201 Cat. No. 18175-1-AP, rabbit 1:150), Edar (Sangon Biotech, Cat. No. D160287,  
202 rabbit 1:100), Fgf20 (Sangon Biotech, D161681, rabbit 1:100). Subsequently,  
203 fluorescent goat anti-rabbit Ig-CY3/FITC-conjugated secondary antibody (Beyotime  
204 biotechnology, Cat. No. A0516/A0562, goat, 1:100) or HRP-conjugated secondary  
205 antibody (Sangon Biotech, Cat. No. 110058, goat, 1:100) were used to specifically  
206 bind to primary antibody. Metal Enhanced DAB Substrate Kit (Solarbio, China) was  
207 used to color developing under the catalysis of HRP. Hoechst33342 (Beyotime  
208 biotechnology, China) was used for nuclei staining and the slides were finally  
209 mounted with Vecatshield mounting media (Vector, USA). H&E staining were  
210 performed according to standard procedures. Fluorescent pictures were taken  
211 under LEICA TCS SP5 II confocal microscopy (Leica Microsystems GmbH, Wetzlar,  
212 Germany). All images of H&E stained sections were taken on an Eclipse 80i  
213 microscope (Nikon, Japan).

214

#### 215 ***DNA extraction, WGBS library construction and sequencing***

216 Genomic DNA was extracted from skin samples (E 65 and E 120) using Qiagen  
217 DNeasy Blood & Tissue Kit (Qiagen, USA) according to the manufacturer's  
218 instructions. Genomic DNA degradation and contamination was monitored on  
219 agarose gels. DNA purity and concentration were checked using the  
220 NanoPhotometer® spectrophotometer (IMPLEN, USA).

221

222 WGBS was performed as previously described (Li et al., 2018) in E65 and E120  
223 skin tissues (n=3) of cashmere goat. A total of 5.2  $\mu$ g of genomic DNA spiked with  
224 26 ng lambda DNA was fragmented by sonication to 200 - 300 bp with Covaris  
225 S220, followed by end repair and adenylation. Cytosine-methylated barcodes were  
226 ligated to sonicated DNA according manufacturer's instructions. Then these DNA  
227 fragments were treated twice with bisulfite using EZ DNA Methylation - Gold™ Kit  
228 (Zymo Research, USA), before the resulting single - strand DNA fragments were  
229 PCR amplified using KAPA HiFi HotStart Uracil + ReadyMix (2X). Library  
230 concentration was quantified by Qubit® 2.0 Fluorometer (Life Technologies, CA,  
231 USA) and quantitative PCR, and the insert size was assayed on Agilent Bioanalyzer  
232 2100 system.

233

234 The libraries were sequenced on an Illumina Hiseq 4000 platform and 150 bp  
235 paired-end reads were generated. Image analysis and base calling were performed  
236 with Illumina CASAVA pipeline. We use FastQC (fastqc\_v0.11.5) to perform basic  
237 statistics on the quality of the raw reads. Then, those reads sequences produced by  
238 the Illumina pipeline in FASTQ format were pre-processed through Trimmomatic  
239 (Trimmomatic-0.36) software using the parameter (SLIDINGWINDOW: 4:15;  
240 LEADING:3, TRAILING:3; ILLUMINACLIP: adapter.fa: 2: 30: 10; MINLEN:36). The  
241 remaining reads that passed all the filtering steps was counted as clean reads and  
242 all subsequent analyses were based on this.

## 243 **Date analysis, identification of DMRs and functional enrichment analysis**

244 For reads mapping to the reference genome, Bismark software (version 0.16.3)  
245 (Krueger and Andrews, 2011) was used to perform alignments of bisulfite-treated  
246 reads to reference genome (-X 700 --dovetail). The reference genome was firstly  
247 transformed into bisulfite-converted version (C-to-T and G-to-A converted) and then  
248 indexed using bowtie 2 (Langmead and Salzberg, 2012). Sequence reads were  
249 also transformed into fully bisulfite-converted versions (C-to-T and G-to-A converted)  
250 before they were aligned to similarly converted versions of the genome in a  
251 directional manner. Sequence reads that produce a unique best alignment from the  
252 two alignment processes (original top and bottom strand) were then compared to  
253 the normal genomic sequence and the methylation state of all cytosine positions in  
254 the read was inferred. The same reads that aligned to the same regions of genome  
255 were regarded as duplicated ones. The sequencing depth and coverage were  
256 summarized using deduplicated reads. The results of methylation extractor  
257 (bismark\_methylation\_extractor, -- no\_overlap) were transformed into bigWig  
258 format for visualization using IGV browser. The sodium bisulfite non-conversion rate  
259 was calculated as the percentage of cytosine sequenced at cytosine reference  
260 positions in the lambda genome.

261  
262 To identify the methylation site, we modeled the sum  $mC$  of methylated counts as a  
263 binomial (Bin) random variable with methylation rate:

$$264 \quad mC \sim \text{Bin}(mC + umC * r).$$

265

266 In order to calculate the methylation level of the sequence, we divided the sequence  
267 into multiple bins within 10 kb in size. The sum of methylated and unmethylated  
268 read counts in each window were calculated. Methylation level (ML) for each  
269 window or C site shows the fraction of methylated Cs, and is defined as:

$$270 \quad ML(C) = \frac{reads(mC)}{reads(mC) + reads(C)}$$

271

272 Calculated ML was further corrected with the bisulfite non-conversion rate  
273 according to previous studies (Ryan et al., 2013). Given the bisulfite non-conversion  
274 rate  $r$ , the corrected ML was estimated as:

$$275 \quad ML_{(\text{corrected})} = \frac{ML - r}{1 - r}$$

276

277 For differentially methylated analysis between the two age groups, differentially  
278 methylated regions (DMRs) were identified using the DSS software (Hao et al.,  
279 2014; Yongseok and Wu, 2016). According to the distribution of DMRs through the  
280 genome, we defined the genes related to DMRs as genes whose gene body region  
281 (from TSS to TES) or promoter region (upstream 2 kb from the TSS) have an  
282 overlap with the DMRs. GO enrichment and KEGG pathway analyses were  
283 conducted for the differentially methylated and expressed genes to investigate their  
284 biological processes and functions.

## 285 **Bisulfite sequencing polymerase chain reaction (BSP-PCR)**

286 BSP-PCR was performed as we previously described (Wang et al., 2018) using E  
287 65 and E 120 skin tissues genomic DNA. Every stage included three biological  
288 repetition. DNA treatment with sodium bisulfite was performed using the EZ DNA  
289 Methylation Kit (Zymo Research, USA) according to the manufacturer's protocol,

290 except that the conversion temperature was changed to 55 °C. The modified DNA  
291 samples were diluted in 10 µL of distilled water and should be immediately used in  
292 BSP or stored at - 80 °C until PCR amplification. The BSP primers were designed  
293 by the online MethPrimer software (<http://www.urogene.org/methprimer/>). The  
294 sequences of PCR primers used for amplifying the targeted products were shown  
295 Table S1. We used hot start DNA polymerase (Zymo Taq™ Premix, Zymo  
296 Research, USA) for BSP production. PCR was performed in 50 µL of reaction  
297 volume, containing 200 ng genomic DNA, 0.3 µM of each primer, Zymo Taq™  
298 Premix 25 µL. The PCR was performed with a DNA Engine Thermal Cycler  
299 (Bio-Rad, USA) using the following program: 10 min at 95 °C, followed by 45 cycles  
300 of denaturation for 30 s at 94 °C, annealing for 40 s at 52 °C and extension for 30 s  
301 at 72 °C, with a final extension at 72 °C for 7 min. The PCR products were gel  
302 purified using Gel Purification Kit (Sangon, China), and then subcloned into the  
303 pGEM T-easy vector (Promega, USA). Different positive clones for each subject  
304 were randomly selected for sequencing (Sangon, China). We sequenced at least 5  
305 clones from each independent set of amplification and cloning, hence, there were  
306 more than 15 clones for each DMR at E 65 and E 120 stage. The final sequence  
307 results were processed by online QUMA software 15  
308 (<http://quma.cdb.riken.jp/top/index.html>).

## 309 **Results**

### 310 ***The morphology of hair follicle induction and differentiation stages in*** 311 ***cashmere goat***

312 Firstly, the corresponding hair follicle morphogenetic stages from E 65 and E 120  
313 fetus cashmere skin were identified by H&E staining. As revealed by the H&E  
314 staining assay, hair follicle morphogenesis of cashmere goat initiated around E 65  
315 with the characteristics of crowded epidermal keratinocytes, which showed  
316 enlarged and elongated, and got organized in microscopically recognizable hair  
317 placode (Pc). Meanwhile, Pc formation was succeeded by along with dermal  
318 condensate (DC) of specialized fibroblasts in the underlying mesenchyme (**Fig. 1a**  
319 and **c**). Up to E 120, the majority of primary hair follicles had matured with complete  
320 structure and hair shaft had emerged through epidermis, while the hair canal of  
321 secondary hair follicle was visible and the hair shaft began to grow up (**Fig. 1b** and  
322 **d**). In general, E 65 represented the induction stage, while the E 120 represented  
323 the differentiation stage of hair follicle morphogenesis.

### 324 ***Defining distinct molecular signatures of hair follicle induction and*** 325 ***differentiation***

326 To reveal the distinct molecular signatures underlying hair follicle induction and  
327 differentiation in cashmere goat, we performed RNA-seq on E 65 and E 120 skin  
328 tissues using Illumina Hiseq 4000 system (n=3) (**Fig. 2a**). This approach resulted in  
329 a high-quality output, about 94.9 % index reads with quality score (Q score) >30 for  
330 all samples. On average, 99 million total clean reads and 93 million aligned reads  
331 were produced per sample. Next, we proceeded by mapping, aligning, and  
332 quantifying these reads to compute differentially expressed genes between E65  
333 and E120 stages.

334  
335 Through comparing the RNA-seq data between E 65 and E 120, a total of 3,666  
336 differential expressed genes (DEGs, Fold Change ≥ 2 and *P*-adjust value ≤ 0.05)  
337 were found, in which 1,729 genes were down regulated and 1,937 genes were up

338 regulated in E 120 compared with E 65 (**Fig. 2b**) (Additional file 1). KEGG analysis  
339 of the DEGs revealed significant functional enrichment of cell migration and  
340 aggregation, highlighting the central roles of intercellular crosstalk and dynamic cell  
341 rearrangement in promoting skin and hair follicle development (**Fig. 2c**). Specifically,  
342 Wnt and Eda signaling pathways were enriched in our study, which had been  
343 previously demonstrated to play an important role in mouse hair induction (Chen et  
344 al., 2012; Zhang et al., 2009). In addition, Wnt and Notch signaling had been  
345 demonstrated to take part in mouse hair differentiation (Lin et al., 2000; Oujii et al.,  
346 2008) (Fig. S1). To confirm the expression pattern of the DEGs, we randomly  
347 selected 4 genes (*Vcan*, *Fn1*, *Tgfb1*, *Sox9*) to validate their expression patterns  
348 using qRT-PCR (**Fig. 3a**). The results were in accordance with the RNA-seq data,  
349 suggesting that the expression patterns based on RNA-seq data were reliable.  
350 We revealed that a number of keratin and keratin-associated protein genes were  
351 up-regulated or specifically expressed in E 120 (Additional file 1), which was in  
352 accordance with the phenotype of hair shaft development in E 120 and that keratin  
353 and keratin-associated protein are major structural proteins of hair shaft (Rogers,  
354 2004). Correspondingly, signaling genes belong to Wnt and Notch pathways were  
355 up-regulated in E 120, at the same time, transcriptional factors including Hoxc13,  
356 Sox9, Sox21, Junb, Lhx2, Vdr, Dlx3 and Gata3 (Dunn et al., 1998; Hwang et al.,  
357 2008; Jave-Suarez et al., 2002; Kaufman, 2003; Powell et al., 1992; Törnqvist et al.,  
358 2010; Vidal et al., 2005) were up-regulated or specifically expressed in E 120  
359 detected by RNA-seq (Additional file 1), qRT-PCR (**Fig. 3b**) and semi-quantitative  
360 RT-PCR (Fig. S2). Furtherly, the expression of Sox9 and Vdr was reconfirmed using  
361 Immunofluorescence (IF), the results showed that Sox9 mainly expressed in the  
362 outer root sheath and Vdr mainly expressed in the outer root sheath and hair shaft  
363 in E 120 (**Fig. 3c**), while not expressed in E 65 (data not shown). These results  
364 highlighted the central roles of these transcriptional factors and signals in hair  
365 follicle differentiation. Besides, we found several specific genes, which were the  
366 critical genes in specific cell types –Pc and DC during hair follicle morphogenesis at  
367 E 14.5 in mice (Ahn, 2014; Biggs and Mikkola, 2014; Sennett et al., 2015) were  
368 expressed at E 65 of cashmere goat (FPKM >0.5) (Fig. S3), which indicated that  
369 these genes may play important roles in hair induction. To further validate the  
370 specificity of these genes, we performed IHC validation. The result showed that  
371 Edar, Bmp2 and Fgf20 specifically expressed in Pc, while Bmp4 specifically  
372 expressed in DC (**Fig. 4a-d**), which suggested that these genes could be the  
373 markers for Pc and DC in cashmere goat.

#### 374 ***Wnt signal in hair follicle induction and differentiation***

375 From our study and previous studies, Wnt signaling is one of the foremost signaling  
376 during hair induction and hair differentiation (Chen et al., 2012; Glover et al., 2017).  
377 However, which cell generates the Wnt signal molecules and which cell receives  
378 the signal during hair induction is still unclear.  $\beta$ -catenin is stabilized expressed in  
379 the nucleus when extracellular Wnt proteins bind to Frizzled receptors and  
380 low-density related lipoproteins in the target cell membrane (Tsai et al., 2014).  
381 Hence, in our study, we detected the expression of  $\beta$ -catenin using IF to reflect the  
382 activated Wnt signal. The result revealed that  $\beta$ -catenin was expressed in epidermal  
383 hair follicle placode (**Fig. 5a**), suggesting Wnt signal is activated in epidermal cells  
384 during hair induction. Consistent with that, Fzd10, the receptor of Wnt ligands, was  
385 also expressed in epidermal hair follicle placode (**Fig. 5c**). Meanwhile, Wnt ligands  
386 are lipid-modified extracellular glycoproteins that require the activity of wntless  
387 protein (Wls) for secretion (Bänziger et al., 2006). In order to investigate which cell



388 emits the Wnt ligands, we examined the expression of Wls protein by IF on dorsal  
389 skin at E 65. Wls protein was detectable in the surface ectoderm as cytoplasmic  
390 staining and was enriched in the early developing hair follicle placode rather than  
391 dermal cells (**Fig. 5b**). The result suggested that the Wnt signal in hair placode was  
392 activated under the control of Wnt ligand from hair placode. At E 120, Wls and  
393  $\beta$ -catenin were expressed in outer root sheath, matrix and hair shaft (**Fig. 5d-e**)  
394 which was in accordance with previous studies in mice (Millar et al., 1999),  
395 suggesting Wnt signal also play an important role in cashmere goat hair  
396 differentiation.

### 397 ***LncRNA analysis of skin hair follicle development***

398 To investigate whether lncRNA takes part in DNA methylation and plays an  
399 important role in hair follicle induction and differentiation, lncRNA transcriptome  
400 from RNA-seq was analyzed to define the lncRNA patterns in E 65 and E 120 skin  
401 tissues. After rigorous process of selection and coding potential analysis using the  
402 software CNCI (<https://github.com/www-bioinfo-org/CNCI>), CPC  
403 (<http://cpc.cbi.pku.edu.cn/>) and Pfam-scan (<http://pfam.xfam.org/>), 1407 annotated  
404 lncRNAs (Additional file 4) and 13881 novel lncRNAs loci (Additional file 5)  
405 including long intergenic non-coding RNA (lincRNAs), intronic lncRNA and  
406 anti-sense lncRNAs were identified (**Fig. 6a and b**). Compared with protein coding  
407 transcripts, lncRNA showed shorter ORF length, transcript length and less exon  
408 number (**Fig. 6c**).  
409

410 Using edgeR, the differentially expressed lncRNAs (Fold Change  $\geq 2$  and P-adjust  
411 value  $\leq 0.05$ ) between E 65 and E 120 were screened, resulting in 192 differentially  
412 expressed lncRNAs including 45 up-regulated and 147 down-regulated lncRNAs in  
413 E 120 compared with E 65 (Fig S4a) (Additional file 6). Meanwhile, a few lncRNAs  
414 were specifically expressed at a single developmental stage of hair morphogenesis,  
415 such as lnc\_006636 showed E 65-specific expression, while lnc\_000374,  
416 lnc\_001937 and lnc\_009323 showed E 120-specific expression, indicating that  
417 these lncRNAs could regulate cashmere morphogenesis through their  
418 spatio-temporal expression. Subsequently, we randomly selected 5 differentially  
419 expressed lncRNAs to validate their expression patterns using qRT-PCR. The  
420 results were in accordance with the RNA-seq data and showed that lnc\_000374  
421 and lnc\_002056 specifically expressed at E 120 (**Fig. 7**), suggesting that the  
422 expression patterns based on RNA-seq data were reliable.  
423

424 To investigate the function of lncRNAs, the potential targets of lncRNAs in *cis* and  
425 *trans* were predicted. For the *cis* action of lncRNAs, we searched for protein-coding  
426 genes 100 kb upstream and downstream of the lncRNAs. For the *trans* role of  
427 lncRNAs in protein-coding genes was examined based on its expression correlation  
428 coefficient (Pearson correlation  $\geq 0.95$  or  $\leq -0.95$ ). Subsequently, KEGG analysis  
429 was performed on these target genes. As a result, the target genes enriched in hair  
430 follicle related signaling pathways including Wnt, Focal adhesion and Ecm receptor  
431 pathway (Fig. S4b), indicating lncRNA may participate in hair induction and  
432 differentiation through regulating related target genes.

### 433 ***Genome DNA methylation of hair induction and differentiation during*** 434 ***morphogenesis***

435 We found the differential genes between E 65 and E 120, which indicated that hair  
436 morphogenesis is the consequence of the spatial and temporal expression of genes.

437 As known, DNA methylation plays a critical role in those genes' expression (Suzuki  
438 and Bird, 2008). However, the regulation mechanism of DNA methylation during  
439 hair morphogenesis remains unknown in cashmere goat. Therefore, we detected  
440 the DNA methylation at E 65 and E 120 (n=3) skin tissues using WGBS. A total of  
441 195.37 G and 187.09 G raw data were generated for the E 65 and E 120 groups,  
442 respectively. An average of 212 million raw reads of WGBS data for the E 65 and E  
443 120 groups were analyzed. Approximately 90.20 % (E 65) and 89.6 % (E 120) of  
444 clean reads could be independently mapped to the goat reference genome  
445 assembly ARS1 (Table S2 and S3). Any ambiguously mapped and duplicate reads  
446 were removed from downstream analysis. Then, the methylation levels of each  
447 cytosine were calculated.

448  
449 An average of 1.78 % and 1.97 % methylated cytosines (mCs) of all genomic C  
450 sites in E 65 and E 120 were detected, respectively (Table S4), suggesting the mC  
451 level in hair follicle induction stage was higher than that in hair follicle differentiation  
452 stage during hair follicle morphogenesis. Methylation in goats was found to exist in  
453 three classifications: mCG, mCHH (where H is A, C, or T), and mCHG, in which  
454 mCG was the predominant type (>96 %) in both E 65 and E 120 groups. To  
455 examine the overall methylation status, methylation levels in different genetic  
456 structural regions were determined, including promoters, exons, introns, CpG  
457 islands (CGIs) and CGI shores (regions within 2 kb of an island). At the  
458 genome-wide scale, the E 65 samples (hair follicle induction stage) exhibited a  
459 higher CG methylation status in all regions (**Fig. 8**), which indicated that  
460 demethylation took place in E 120 (hair follicle differentiation stage) to ensure the  
461 cell lineages. In accordance with that, qRT-PCR showed that Tet3, which  
462 intermediates in the process of DNA demethylation as DNA hydroxylases, was  
463 expressed higher in E 120 compared with E 65 (Fig. S5). Meanwhile, a marked  
464 hypo-methylation was observed in the regions surrounding transcription start site  
465 corresponding with the previous studies (Jones, 2012).

466  
467 To identify genomic regions with different levels of methylation between the E 65  
468 and E 120 stages, methylated residues were examined by analyzing sliding  
469 windows of 1000 bp in length using DSS. A total of 6899 differentially methylated  
470 regions (DMRs) were identified, including 5241 hyper DMRs and 1658 hypo DMRs  
471 in E 120 compared with E 65 (Additional file 2). Next, the genes within the DMRs  
472 were annotated using the ARS1 assembly. The analysis revealed a total of 3371  
473 genes that were determined to be differentially methylated genes (DMGs) (**Fig. 9a**).  
474 To obtain a better mechanistic understanding on the gene regulatory networks  
475 controlled by DNA methylation that may be responsible for functional differences  
476 during hair induction and differentiation. KEGG analysis revealed that the DMGs  
477 were enriched in TGF- $\beta$  and Focal adhesion signaling pathways (**Fig. 9b**). These  
478 results highlighted the central roles of DNA methylation regulation in intercellular  
479 crosstalk and signaling transduction during hair follicle induction and differentiation.

#### 480 ***Integrated analysis of WGBS and mRNA-seq data***

481 To determine the relationship between DNA methylation and gene expression, the  
482 integrated analysis of WGBS and RNA-seq data was performed. As a result, we  
483 detected 547 hypo-methylation genes with higher expression in E 120 while 282  
484 hyper-methylation genes with lower expression in E 120 compared with E 65  
485 (Additional file 3) (**Fig. 10**). In order to verify the relationship between DNA  
486 methylation and gene expression, four genes involved in hair follicle development

487 were selected to reconfirm using BSP-seq and qRT-PCR. The result of BSP-seq  
488 was in accordance with that of the WGBS, and the gene expressions were in  
489 accordance with the RNA-seq data, in which the genes was repressed by the high  
490 DNA methylation (**Fig. 11**).

491 It was noteworthy that the transcriptional factor genes associated with hair  
492 differentiation including *Gata3*, *Vdr*, *Cux1*, *Tp63* and *Runx1* had low expression with  
493 high DNA methylation during hair induction stage in our integrated analysis on  
494 WGBS and RNA-seq data. Meanwhile, the signaling genes associated with hair  
495 differentiation and development including *NOTCH1*, *NOTCH3*, *JAG1*, *FZD1*,  
496 *SMAD7* and keratin gene *KRT40* had similar expressions and DNA methylation  
497 patterns with above transcriptional factor genes (Table 1). The results suggested  
498 that DNA methylation play an important role in hair differentiation through regulating  
499 associated gene expression. Hair differentiation-related genes did not express in  
500 hair induction stage with high methylation, while expressed with hypo-methylation  
501 when hair differentiation. Demethylation may occur in hair differentiation to regulate  
502 DNA methylation and gene expression.

### 503 **Potential lncRNA that could take part in DNA methylation**

504 Furtherly, in order to investigate the function of lncRNA on gene expression  
505 regulation through mediating DNA methylation, integrated analysis of lncRNA,  
506 mRNA transcriptome and WGBS were performed. As a result, the potential  
507 differential expressed lncRNAs associated with DNA methylation on target genes  
508 were revealed (Additional file 7). Such as, lncRNA XR\_001918556 may affect the  
509 DNA methylation of transcriptional factor gene *Gata3*, lnc-013255 may affect the  
510 DNA methylation of transcriptional factor gene *Tp63*, lnc-003786 affect *Fgfr2*,  
511 lnc-002056 affect *teneurin-2* which encodes transmembrane proteins. lnc-007623  
512 may affect the DNA methylation of *Add1* gene, which encode a cytoskeletal protein.  
513 The lncRNA expression patterns in different tissues of E120 and skin different  
514 stages were show in figure S6. We found lnc-002056, lnc-007623 and lnc-000374  
515 were specifically expressed in skin tissue at E120, corresponding with the hyper  
516 DNA methylation of their target genes at E120, which indicated their potential role  
517 on DNA methylation regulation.

518

### 519 **Discussion**

520 Mouse pelage hair follicle formation has been divided into nine distinct  
521 developmental stages (0-8) for twenty years (Paus et al., 1999). Increasing  
522 functional molecules have been identified and characterized for each stage using  
523 spontaneous mouse mutants and genetically engineered mice(Nakamura et al.,  
524 2013; Saxena et al., 2019; Sundberg et al., 2005). However, there are few reports  
525 regarding the machinery underlying cashmere goat hair follicle morphogenesis due  
526 to technical difficulties and high costs. Although there are conservative signals in  
527 hair follicle development among mammals, however, different physiology and  
528 regulation mechanism exists between mouse and cashmere goat. Cashmere is  
529 nonmedullated and under the control of seasonal variation of light, which is different  
530 from mice (Ge et al., 2018; Mcdonald et al., 1987). Further evidencing the  
531 differences is the fact that, *EDAR* gene-targeted cashmere goats showed different  
532 phenotypes in hair follicle compared with the targeted mice (Hao et al., 2018;  
533 Srivastava et al., 1997). As hair follicle morphogenesis and development determine  
534 the yield and quality of cashmere, it is critical to reveal the underlying molecular

535 mechanism. Hence, based on H&E staining results, E 65 and E 120 samples were  
536 selected to identify the signals and genes involved in hair induction and  
537 differentiation stages.

538

539 Hair follicle morphogenesis relies on the interaction between epidermal and dermal  
540 cells, ultimately resulting in differentiation of hair shaft, root sheaths, and dermal  
541 papilla (Rogers, 2004; Saxena et al., 2019). Corresponding with that, through  
542 RNA-seq and bioinformatics analysis, the DEGs were found related to signaling,  
543 cell migration and aggregation highlighting the central roles of intercellular crosstalk  
544 and dynamic cell rearrangement in hair morphogenesis. Specifically, Wnt signal has  
545 been demonstrated play a critical role in hair induction (Andl et al., 2002; Zhang et  
546 al., 2008). However, accurate signal transmission between different cells is still  
547 unknown during hair induction. Through IF of  $\beta$ -catenin and WIs, we revealed that  
548 the Wnt signal in hair placode is activated under the control of Wnt ligand from hair  
549 placode. Meanwhile, a number of keratins had a similar expression pattern with  
550 some transcriptional factors, which specifically expressed in E 120, suggesting that  
551 these transcriptional factors played critical roles in hair follicle differentiation and  
552 keratin expression. Furthermore, the signature genes for Pc and DC were found  
553 through comparing with related reports on mice (Sennett et al., 2015), the result  
554 contributed to illustrating the accurate signal communication between different cells  
555 and could be used as markers to isolate specific cells.

556

557 During early embryonic development, cells start from a pluripotent state, from which  
558 they can differentiate into multiple cell types, and progressively develop a narrower  
559 differentiation potential (Wolf, 2007). Their gene-expression programs become  
560 more defined and restricted, in which DNA methylation play a critical role in this  
561 process (Michael et al., 2007; Ozkul and Galderisi, 2016). Unlike embryonic stem  
562 cells, progenitors are restricted to a certain lineage but have the potential to  
563 differentiate into distinct terminal cell types upon stimulation. During hair  
564 morphogenesis, hair progenitor cells start in a multipotent state, from which they  
565 can differentiate into many hair cell types, and progressively develop a narrower  
566 potential (Klose and Bird, 2006; Senner, 2011; Wolf, 2007). However, the DNA  
567 methylation changes of lineage-committed progenitors to terminally differentiated  
568 cells are largely unknown. Recently, researches demonstrated that DNA  
569 methylation is a critical cell-intrinsic determinant for astrocyte, muscle satellite cells  
570 and mammary epithelial cells differentiation and development (Dirk, 2015). Sen et al.  
571 revealed that the dynamic regulation of DNA methylation patterns was  
572 indispensable for progenitor maintenance and self-renewal in mammalian somatic  
573 tissue. DNMT1 protein was found enriched in undifferentiated cells, where it was  
574 required to retain proliferative stamina and suppress differentiation (Sen et al.,  
575 2010). Li revealed that DNA methylation played an important role in maintaining hair  
576 follicle stem cell homeostasis during its development and regeneration (Li et al.,  
577 2012). However, the DNA methylation change during hair morphogenesis is still  
578 unknown. In our study, we revealed that the DNA methylation was lower in hair  
579 follicle differentiation compared with hair follicle induction stage. Furtherly, hair  
580 follicle differentiation genes including transcriptional factors and signaling genes  
581 were methylated in hair induction stage but were subsequently de-methylated  
582 during differentiation. The result suggested that DNA methylation patterns are  
583 required for hair induction and differentiation. Correspondingly, Bock revealed that  
584 DNA methylation changes were locus specific and overlapped with  
585 lineage-associated transcription factors and their binding sites, which played an

586 important role during in vivo differentiation of adult stem cells (Bock et al., 2012) and  
587 that demethylation events were frequently linked to brain specific gene activation  
588 upon terminal neuronal differentiation (Guo et al., 2014).

589

590 Another related report in Shanbei cashmere goat, Li et al. previously revealed that  
591 DNA methylation had little effect on gene expression when telogen-to-anagen  
592 transition in adult Shanbei White cashmere goat (Li et al., 2018). Combined with the  
593 above researches, the DNA methylation patterns from oocyte to adult including hair  
594 follicle morphogenesis and cycling were described in Shanbei White cashmere goat  
595 (**Fig. 12**). DNA methylation was higher in adult than embryonic period and had little  
596 change when telogen-to-anagen transition in adult Shanbei White Cashmere goat.  
597 The darker color represents the higher DNA methylation. The results will enrich the  
598 regulatory network of hair morphogenesis.

599

600 Above, we revealed that locus specific DNA methylation changes played a critical  
601 role during hair morphogenesis. However, both DNA methyltransferases and  
602 polycomb repressive complexes lack sequence-specific DNA-binding motifs.  
603 Increasing evidence indicates that many lncRNAs contain DNA-binding motifs that  
604 can bind to DNA by forming RNA:DNA triplexes and recruit chromatin-binding  
605 factors to specific genomic sites to methylate DNA and chromatin (Han and Chang,  
606 2015; Sun et al., 2016). Besides, lncRNA have been associated with important  
607 cellular processes such as X-chromosome inactivation, imprinting and maintenance  
608 of pluripotency, lineage commitment and apoptosis (Engreitz et al., 2013;  
609 Mohammad et al., 2012; St et al., 2015). However, the function of lncRNA in hair  
610 morphogenesis is still unknown. In our study, we revealed lncRNA may have a  
611 function through targeting hair follicle related signals and genes. Furtherly, potential  
612 lncRNA involved in DNA methylation was revealed. However, the specific function  
613 of lncRNA need to be further studied. The results provide a potential regulatory  
614 mechanism mediated by lncRNA during hair morphogenesis.

## 615 **Conclusions**

616 In this study, the critical signals and genes were revealed during hair follicle  
617 morphogenesis in cashmere goat. In this process, differentiation genes were  
618 governed by DNA methylation, resulting in repressed expression in hair follicle  
619 induction stage and high expression in hair follicle differentiation stage. Furtherly,  
620 potential lncRNAs associated with DNA methylation on target gene were revealed.  
621 This study would enrich the regulatory network and molecular mechanisms in hair  
622 morphogenesis.

## 623 **Supplementary Materials**

624 Fig. S1: The heatmaps of DEGs associated with signaling pathways related to hair  
625 follicle development, Fig. S2: Semi-quantitative RT-PCR confirmed the expression  
626 of partial DEGs associated with hair follicle development between E65 and E120 in  
627 cashmere goat, Fig. S3: The potential cell-type-specific markers during hair  
628 induction and differentiation in Shanbei White Cashmere goat, Fig. S4: Differentially  
629 expressed lncRNAs and their KEGG analysis in cashmere goat skin between E65  
630 and E120 during hair morphogenesis, Fig. S5: Tet3 was expressed higher in E120  
631 compared with E65, Fig. S6: The lncRNA expression patterns in different tissues of  
632 E120 and skin different stages, Table S1: Primer list for qRT-PCR, Table S2: Data  
633 statistics of WGBS at E65 and E120 of cashmere goat, Table S3: The quality

634 control of WGBS data at E65 and E120 of cashmere goat, Table S4 The statistics of  
635 methylation in genome scale at E65 and E120 of cashmere goat.

636

### 637 **Author Contributions**

638 Conceptualization, Xin Wang and Shanhe Wang; software, Shanhe Wang;  
639 validation, Shanhe Wang, Fang Li, Yuelang Zhang and Yujie Zheng.; resources, Lei  
640 Qu and Jinwang Liu; data curation, Xin Wang and Fang Li.; writing—original draft  
641 preparation, Shanhe Wang; visualization, Shanhe Wang and Wei Ge; supervision,  
642 Xin Wang; project administration, Xin Wang and Lei Qu; funding acquisition, Xin  
643 Wang.

### 644 **Acknowledgements**

645 This research was funded by the National Natural Science Foundation of China  
646 (No.31772573).

### 647 **Competing Interests**

648 The authors declare no conflict of interest.

### 649 **Accession Numbers**

650 All the RNA-seq data and WGBS data sets supporting the results of this article have  
651 been submitted to the National Center for Biotechnology Information (NCBI) Gene  
652 Expression Omnibus (GEO). mRNA-seq data: SAMN13669153, SAMN13669154,  
653 SAMN13669155, SAMN13669156, SAMN13669157, SAMN13669158. WGBS-seq  
654 data: SAMN13679866, SAMN13679867, SAMN13679868, SAMN13679869,  
655 SAMN13679870, SAMN13679871.

### 656 **Appendix**

657 Additional file 1: The differential expressed genes between E65 and E120 stages  
658 during hair follicle morphogenesis in cashmere goat (xlsx, 4406 KB)

659 Additional file 2: Differentially methylated regions between E65 and E120 during  
660 hair morphogenesis in cashmere goat (xlsx, 899 KB)

661 Additional file 3: The DEGs negatively correlated with DNA methylation between  
662 E65 and E120 of cashmere goat (xlsx, 119 KB)

663 Additional file 4: The sequences of annotated lncRNAs in E65 and E120 skin of  
664 cashmere goat (xlsx, 2352 KB)

665 Additional file 5: The sequences of novel lncRNAs in E65 and E120 skin of  
666 cashmere goat (xlsx, 17465 KB)

667 Additional file 6: The differential expressed lncRNAs between E65 and E120 stages  
668 during hair follicle morphogenesis in cashmere goat (xlsx, 69 KB)

669 Additional file 7: The potential differentially expressed lncRNAs associated with  
670 DNA methylation on target genes (xlsx, 631 KB)

671

### 672 **References**

673 Ahn, Y., 2014. Signaling in tooth, hair, and mammary placodes. *Current Topics in*  
674 *Developmental Biology* 111, 421-459.

675 Andl, T., Reddy, S.T., Gaddapara, T., Millar, S.E., 2002. WNT Signals Are Required for the  
676 Initiation of Hair Follicle Development. *Developmental Cell* 2, 643-653.

677 Asakawa, K., Toyoshima, K.E., Tsuji, T., 2017. Functional Hair Follicle Regeneration by the

- 678 Rearrangement of Stem Cells. *Methods Mol Biol* 1597, 117-134.
- 679 Avigad Laron, E., Amar, E., Enshell-Seiffers, D., 2018. The Mesenchymal Niche of the  
680 Hair Follicle Induces Regeneration by Releasing Primed Progenitors from Inhibitory  
681 Effects of Quiescent Stem Cells. *Cell reports* 24, 909-921 e903.
- 682 Bak, S.S., Kwack, M.H., Shin, H.S., Kim, J.C., Kim, M.K., Sung, Y.K., 2018. Restoration of  
683 hair-inductive activity of cultured human follicular keratinocytes by co-culturing with  
684 dermal papilla cells. *Biochemical and biophysical research communications* 505,  
685 360-364.
- 686 Bänziger, C., Soldini, D., Schütt, C., Zipperlen, P., Hausmann, G., Basler, K., 2006. Wntless,  
687 a Conserved Membrane Protein Dedicated to the Secretion of Wnt Proteins from  
688 Signaling Cells. *Cell* 125, 509-522.
- 689 Baubec, T., Schubeler, D., 2014. Genomic patterns and context specific interpretation of  
690 DNA methylation. *Current opinion in genetics & development* 25, 85-92.
- 691 Biggs, L.C., Mikkola, M.L., 2014. Early inductive events in ectodermal appendage  
692 morphogenesis. *Seminars in cell & developmental biology* 25-26, 11-21.
- 693 Bock, C., Beerman, I., Lien, W.H., Smith, Z.D., Gu, H., Boyle, P., Gnirke, A., Fuchs, E.,  
694 Rossi, D.J., Meissner, A., 2012. DNA methylation dynamics during in vivo  
695 differentiation of blood and skin stem cells. *Molecular cell* 47, 633-647.
- 696 Botchkarev, V.A., Kishimoto, J., 2003. Molecular Control of Epithelial–Mesenchymal  
697 Interactions During Hair Follicle Cycling. *Journal of Investigative Dermatology*  
698 *Symposium Proceedings* 8, 46-55.
- 699 Cai, B., Zheng, Y., Ma, S., Xing, Q., Wang, X., Yang, B., Yin, G., Guan, F., 2018. Long  
700 noncoding RNA regulates hair follicle stem cell proliferation and differentiation through  
701 PI3K/AKT signal pathway. *Mol Med Rep* 17, 5477-5483.
- 702 Carlson, H.L., Quinn, J.J., Yang, Y.W., Thornburg, C.K., Chang, H.Y., Scott, S.H., 2015.  
703 LncRNA-HITFunctions as an Epigenetic Regulator of Chondrogenesis through Its  
704 Recruitment of p100/CBP Complexes. *PLoS genetics* 11, e1005680.
- 705 Chen, D., Jarrell, A., Guo, C., Lang, R., Atit, R., 2012. Dermal beta-catenin activity in  
706 response to epidermal Wnt ligands is required for fibroblast proliferation and hair  
707 follicle initiation. *Development* 139, 1522-1533.
- 708 Chen, X., Xie, R., Gu, P., Huang, M., Han, J., Dong, W., Xie, W., Wang, B., He, W., Zhong,  
709 G., Chen, Z., Huang, J., Lin, T., 2019. Long Noncoding RNA LBCS Inhibits  
710 Self-Renewal and Chemoresistance of Bladder Cancer Stem Cells through Epigenetic  
711 Silencing of SOX2. *Clinical cancer research : an official journal of the American*  
712 *Association for Cancer Research* 25, 1389-1403.
- 713 Chibucos, M.C., 2015. Gene Ontology Consortium: going forward. *Nucleic Acids Res* 43,  
714 D1049.
- 715 Council, N.R., 2011. *Guide for the Care and Use of Laboratory Animals: Eighth Edition*. The  
716 *National Academies Press*, Washington, DC.
- 717 Dirk, S., 2015. Function and information content of DNA methylation. *Nature* 517, 321-326.
- 718 Dunn, S.M., Keough, R.A., Rogers, G.E., Powell, B.C., 1998. Regulation of a hair follicle  
719 keratin intermediate filament gene promoter. *Journal of cell science* 111 ( Pt 23), 3487.
- 720 Engreitz, J.M., Pandyajones, A., Mcdonel, P., Shishkin, A., Sirokman, K., Surka, C., Kadri,

- 721 S., Xing, J., Goren, A., Lander, E.S., 2013. The Xist lncRNA exploits three-dimensional  
722 genome architecture to spread across the X-chromosome. *Science* 341, 767.
- 723 Feng, J., Zhou, Y., Campbell, S.L., Le, T., Li, E., Sweatt, J.D., Silva, A.J., Fan, G., 2010.  
724 Dnmt1 and Dnmt3a maintain DNA methylation and regulate synaptic function in adult  
725 forebrain neurons. *Nature Neuroscience* 13, 423-430.
- 726 Ge, W., Wang, S.-H., Sun, B., Zhang, Y.-L., Shen, W., Khatib, H., Wang, X., 2018.  
727 Melatonin promotes Cashmere goat (*Capra hircus*) secondary hair follicle growth: a  
728 view from integrated analysis of long non-coding and coding RNAs. *Cell Cycle* 17,  
729 1255-1267.
- 730 Glover, J.D., Wells, K.L., Matthaus, F., Painter, K.J., Ho, W., Riddell, J., Johansson, J.A.,  
731 Ford, M.J., Jahoda, C.A.B., Klika, V., Mort, R.L., Headon, D.J., 2017. Hierarchical  
732 patterning modes orchestrate hair follicle morphogenesis. *PLoS biology* 15, e2002117.
- 733 Guo, J.U., Su, Y., Shin, J.H., Shin, J., Li, H., Xie, B., Zhong, C., Hu, S., Le, T., Fan, G., 2014.  
734 Distribution, recognition and regulation of non-CpG methylation in the adult  
735 mammalian brain. *Nature Neuroscience* 17, 215-222.
- 736 Han, P., Chang, C.P., 2015. Long non-coding RNA and chromatin remodeling. *Rna Biology*  
737 12, 1094-1098.
- 738 Hao, F., Conneely, K.N., Hao, W., 2014. A Bayesian hierarchical model to detect  
739 differentially methylated loci from single nucleotide resolution sequencing data. *Nucleic  
740 Acids Res* 42, e69.
- 741 Hao, F., Yan, W., Li, X., Wang, H., Wang, Y., Hu, X., Liu, X., Liang, H., Liu, D., 2018.  
742 Generation of Cashmere Goats Carrying an EDAR Gene Mutant Using  
743 CRISPR-Cas9-Mediated Genome Editing. *International Journal of Biological Sciences*  
744 14, 427-436.
- 745 Huh, S.H., Narhi, K., Lindfors, P.H., Haara, O., Yang, L., Ornitz, D.M., Mikkola, M.L., 2013.  
746 Fgf20 governs formation of primary and secondary dermal condensations in  
747 developing hair follicles. *Genes & development* 27, 450-458.
- 748 Hwang, J., Mehrani, T., Millar, S.E., Morasso, M.I., 2008. Dlx3 is a crucial regulator of hair  
749 follicle differentiation and cycling. *Development* 135, 3149-3159.
- 750 Jave-Suarez, L.F., Winter, H., Langbein, L., Rogers, M.A., Schweizer, J., 2002. HOXC13 is  
751 involved in the regulation of human hair keratin gene expression. *The Journal of  
752 biological chemistry* 277, 3718-3726.
- 753 Jones, P.A., 2012. Functions of DNA methylation: islands, start sites, gene bodies and  
754 beyond. *Nature Reviews Genetics* 13, 484-492.
- 755 Kanehisa, M., Araki, M., Goto, S., Hattori, M., Hirakawa, M., Itoh, M., Katayama, T.,  
756 Kawashima, S., Okuda, S., Tokimatsu, T., 2008. KEGG for linking genomes to life and  
757 the environment. *Nucleic Acids Res* 36, D480-D484.
- 758 Kaufman, C.K., 2003. GATA-3: an unexpected regulator of cell lineage determination in skin.  
759 *Genes & development* 17, 2108-2122.
- 760 Klose, R.J., Bird, A.P., 2006. Genomic DNA methylation: the mark and its mediators. *Trends  
761 in biochemical sciences* 31, 89-97.
- 762 Krueger, F., Andrews, S.R., 2011. Bismark: a flexible aligner and methylation caller for  
763 Bisulfite-Seq applications. *Bioinformatics* 27, 1571-1572.



- 764 Langmead, B., Salzberg, S.L., 2012. Fast gapped-read alignment with Bowtie 2. *Nature*  
765 *methods* 9, 357-359.
- 766 Langmead, R.B.B., Trapnell, C., Pop, M., Salzberg, L. S., 2009. Ultrafast and  
767 memory-efficient alignment of short DNA sequences to the human genome. *Genome*  
768 *Biology* 10, R25.
- 769 Lee, J., Tumber, T., 2012. Hairy tale of signaling in hair follicle development and cycling.  
770 *Seminars in cell & developmental biology* 23, 906-916.
- 771 Li, C., Li, Y., Zhou, G., Gao, Y., Ma, S., Chen, Y., Song, J., Wang, X., 2018. Whole-genome  
772 bisulfite sequencing of goat skins identifies signatures associated with hair cycling.  
773 *BMC Genomics* 19, 638.
- 774 Li, J., Jiang, T.X., Hughes, M.W., Wu, P., Yu, J., Widelitz, R.B., Fan, G., Chuong, C.M., 2012.  
775 Progressive alopecia reveals decreasing stem cell activation probability during aging of  
776 mice with epidermal deletion of DNA methyltransferase 1. *The Journal of investigative*  
777 *dermatology* 132, 2681-2690.
- 778 Lin, M.H., Leimeister, C., Gessler, M., Kopan, R., 2000. Activation of the Notch  
779 pathway in the hair cortex leads to aberrant differentiation of the adjacent hair-shaft  
780 layers. *Development* 127, 2421-2432.
- 781 Mao, X., Cai, T., Olyarchuk, J.G., Wei, L., 2005. Automated genome annotation and  
782 pathway identification using the KEGG Orthology (KO) as a controlled vocabulary.  
783 *Bioinformatics* 21, 3787-3793.
- 784 McDonald, B.J., Hoey, W.A., Hopkins, P.S., 1987. Cyclical fleece growth in cashmere goats.  
785 *Australian Journal of Agricultural Research* 38, 597-609.
- 786 Mesler, A.L., Veniaminova, N.A., Lull, M.V., Wong, S.Y., 2017. Hair Follicle Terminal  
787 Differentiation Is Orchestrated by Distinct Early and Late Matrix Progenitors. *Cell*  
788 *reports* 19, 809-821.
- 789 Michael, W., Ines, H., Stadler, M.B., Liliana, R., Svante, P.B., Michael, R., Dirk, S., 2007.  
790 Distribution, silencing potential and evolutionary impact of promoter DNA methylation  
791 in the human genome. *Nature genetics* 39, 457-466.
- 792 Millar, S.E., 2002. Molecular mechanisms regulating hair follicle development. *The Journal*  
793 *of investigative dermatology* 118, 216-225.
- 794 Millar, S.E., Willert, K., Salinas, P.C., Roelink, H., Nusse, R., Sussman, D.J., Barsh, G.S.,  
795 1999. WNT signaling in the control of hair growth and structure. *Developmental biology*  
796 207, 133-149.
- 797 Mohammad, F., Pandey, G.K., Mondal, T., Enroth, S., Redrup, L., Gyllensten, U., Kanduri,  
798 C., 2012. Long noncoding RNA-mediated maintenance of DNA methylation and  
799 transcriptional gene silencing. *Development* 139, 2792-2803.
- 800 Mok, K.W., Saxena, N., Heitman, N., Grisanti, L., Srivastava, D., Muraro, M.J., Jacob, T.,  
801 Sennett, R., Wang, Z., Su, Y., Yang, L.M., Ma'ayan, A., Ornitz, D.M., Kasper, M., Rendl,  
802 M., 2019. Dermal Condensate Niche Fate Specification Occurs Prior to Formation and  
803 Is Placode Progenitor Dependent. *Dev Cell* 48, 32-48.e35.
- 804 Nakamura, M., Schneider, M.R., Schmidt-Ullrich, R., Paus, R., 2013. Mutant laboratory  
805 mice with abnormalities in hair follicle morphogenesis, cycling, and/or structure: An  
806 update. *Experimental Dermatology* 69, 6-29.

- 807 Ouji, Y., Yoshikawa, M., Moriya, K., Nishiofuku, M., Matsuda, R., Ishizaka, S., 2008.  
808 Wnt-10b, uniquely among Wnts, promotes epithelial differentiation and shaft growth.  
809 *Biochemical & Biophysical Research Communications* 367, 299-304.
- 810 Ozkul, Y., Galderisi, U., 2016. The Impact of Epigenetics on Mesenchymal Stem Cell  
811 Biology. *Journal of Cellular Physiology* 231, n/a-n/a.
- 812 Paus, R., Cotsarelis, G., 1999. The biology of hair follicles. *N Engl J Med* 341, 491-497.
- 813 Paus, R., Muller-Rover, S., Van Der Veen, C., Maurer, M., Eichmuller, S., Ling, G., Hofmann,  
814 U., Foitzik, K., Mecklenburg, L., Handjiski, B., 1999. A comprehensive guide for the  
815 recognition and classification of distinct stages of hair follicle morphogenesis. *The*  
816 *Journal of investigative dermatology* 113, 523-532.
- 817 Powell, B.C., Nesci, A., Rogers, G.E., 1992. Regulation of keratin gene expression in hair  
818 follicle differentiation. *Annals of the New York Academy of Sciences* 642, 1-20.
- 819 Reik, W., Dean, W., 2001. DNA methylation and mammalian epigenetics. *Electrophoresis*  
820 22, 2838-2843.
- 821 Rogers, G.E., 2004. Hair follicle differentiation and regulation. *International Journal of*  
822 *Developmental Biology* 48, 163-170.
- 823 Ryan, L., Mukamel, E.A., Nery, J.R., Mark, U., Puddifoot, C.A., Johnson, N.D., Jacinta, L.,  
824 Yun, H., Dwork, A.J., Schultz, M.D., 2013. Global epigenomic reconfiguration during  
825 mammalian brain development. *Science* 341, 629.
- 826 Saxena, N., Mok, K.W., Rendl, M., 2019. An Updated Classification of Hair Follicle  
827 Morphogenesis. *Exp Dermatol.*
- 828 Schmidt-Ullrich, R., Paus, R., 2005. Molecular principles of hair follicle induction and  
829 morphogenesis. *BioEssays : news and reviews in molecular, cellular and*  
830 *developmental biology* 27, 247-261.
- 831 Schneider, M.R., Schmidt-Ullrich, R., Paus, R., 2009. The hair follicle as a dynamic  
832 miniorgan. *Current biology : CB* 19, R132-142.
- 833 Sen, G.L., Reuter, J.A., Webster, D.E., Lilly, Z., Khavari, P.A., 2010. DNMT1 maintains  
834 progenitor function in self-renewing somatic tissue. *Nature* 463, 563-567.
- 835 Senner, C.E., 2011. The role of DNA methylation in mammalian development. *Reproductive*  
836 *Biomedicine Online* 22, 529-535.
- 837 Sennett, R., Wang, Z., Rezza, A., Grisanti, L., Roitershtein, N., Sicchio, C., Mok, K.W.,  
838 Heitman, N., Clavel, C., Ma'Ayan, A., 2015. An Integrated Transcriptome Atlas of  
839 Embryonic Hair Follicle Progenitors, Their Niche, and the Developing Skin.  
840 *Developmental Cell* 34, 577-591.
- 841 Srivastava, A.K., Pispas, J., Hartung, A.J., Du, Y., Ezer, S., Jenks, T., Shimada, T., Pekkanen,  
842 M., Mikkola, M.L., Ko, M.S., Thesleff, I., Kere, J., Schlessinger, D., 1997. The Tabby  
843 phenotype is caused by mutation in a mouse homologue of the EDA gene that reveals  
844 novel mouse and human exons and encodes a protein (ectodysplasin-A) with  
845 collagenous domains. *Proceedings of the National Academy of Sciences of the United*  
846 *States of America* 94, 13069-13074.
- 847 St, L.G., Wahlestedt, C., Kapranov, P., 2015. The Landscape of long noncoding RNA  
848 classification. *Trends in Genetics* 31, 239-251.
- 849 Storey, J.D., 2003. The Positive False Discovery Rate: A Bayesian Interpretation and the

- 850 q-Value. *Annals of Statistics* 31, 2013-2035.
- 851 Sun, M., Nie, F., Wang, Y., Zhang, Z., Hou, J., He, D., Xie, M., Wei, D., Wang, Z., Wang, J.,  
852 2016. LncRNA HOXA11-AS promotes proliferation and invasion of gastric cancer by  
853 scaffolding the chromatin modification factors PRC2, LSD1 and DNMT1. *Cancer*  
854 *Research* 76, 6299-6310.
- 855 Sundberg, J.P., Peters, E.M., Paus, R., 2005. Analysis of hair follicles in mutant laboratory  
856 mice. *The journal of investigative dermatology. Symposium proceedings* 10, 264-270.
- 857 Suzuki, M.M., Bird, A., 2008. DNA methylation landscapes: provocative insights from  
858 epigenomics. *Nature Reviews Genetics* 9, 465.
- 859 Törnqvist, G., Sandberg, A., Hägglund, A.C., Carlsson, L., 2010. Cyclic Expression of Lhx2  
860 Regulates Hair Formation. *PLoS genetics* 6, e1000904.
- 861 Tsai, S.Y., Sennett, R., Rezza, A., Clavel, C., Grisanti, L., Zemla, R., Najam, S., Rendl, M.,  
862 2014. Wnt/beta-catenin signaling in dermal condensates is required for hair follicle  
863 formation. *Developmental biology* 385, 179-188.
- 864 Vidal, V.P.I., Marie-Christine, C., Susanne, L., George, C., Pleasantine, M., Chi-Chung, H.,  
865 Nicolas, O., Jean-Paul, O., Andreas, S., 2005. Sox9 is essential for outer root sheath  
866 differentiation and the formation of the hair stem cell compartment. *Current Biology* 15,  
867 1340-1351.
- 868 Wang, S., Ge, W., Luo, Z., Guo, Y., Jiao, B., Qu, L., Zhang, Z., Wang, X., 2017. Integrated  
869 analysis of coding genes and non-coding RNAs during hair follicle cycle of cashmere  
870 goat (*Capra hircus*). *Bmc Genomics* 18, 767.
- 871 Wang, S., Luo, Z., Zhang, Y., Yuan, D., Ge, W., Wang, X., 2018. The inconsistent regulation  
872 of HOXC13 on different keratins and the regulation mechanism on HOXC13 in  
873 cashmere goat (*Capra hircus*). *BMC Genomics* 19, 630.
- 874 Wang, X., Tredget, E.E., Wu, Y., 2012. Dynamic signals for hair follicle development and  
875 regeneration. *Stem Cells & Development* 21, 7-18.
- 876 Wolf, R., 2007. Stability and flexibility of epigenetic gene regulation in mammalian  
877 development. *Nature* 447, 425-432.
- 878 Yongseok, P., Wu, H., 2016. Differential methylation analysis for BS-seq data under general  
879 experimental design. *Bioinformatics* 32, 1-10.
- 880 Zhang, Y., Andl, T., Yang, S.H., Teta, M., Liu, F., Seykora, J.T., Tobias, J.W., Piccolo, S.,  
881 Schmidt-Ullrich, R., Nagy, A., Taketo, M.M., Dlugosz, A.A., Millar, S.E., 2008. Activation  
882 of beta-catenin signaling programs embryonic epidermis to hair follicle fate.  
883 *Development* 135, 2161-2172.
- 884 Zhang, Y., Tomann, P., Andl, T., Gallant, N.M., Huelsken, J., Jerchow, B., Birchmeier, W.,  
885 Paus, R., Piccolo, S., Mikkola, M.L., 2009. Reciprocal Requirements for  
886 EDA/EDAR/NF- $\kappa$ B and Wnt/ $\beta$ -Catenin Signaling Pathways in Hair Follicle Induction:  
887 *Developmental Cell*. *Developmental Cell* 17, 49-61.
- 888
- 889
- 890
- 891
- 892

893 **Tables**

894 **Table 1** *The genes associated with hair follicle differentiation under the control*  
 895 *of DNA methylation*

| Gene          | E120<br>FPKM | E65<br>FPKM | log2(fold<br>change) | Pvalue | E120<br>mean<br>Methy | E65 mean<br>Methy | Start     | end       |
|---------------|--------------|-------------|----------------------|--------|-----------------------|-------------------|-----------|-----------|
| <i>Tp63</i>   | 48.8         | 5.3         | 3.2                  | 0.005  | 0.35                  | 0.70              | 77226924  | 77227046  |
| <i>Vdr</i>    | 19.3         | 0.0         | Inf                  | 0.000  | 0.73                  | 0.91              | 31960999  | 31961087  |
| <i>Gata3</i>  | 11.1         | 2.1         | 2.376964             | 0.005  | 0.58                  | 0.83              | 12388542  | 12388674  |
| <i>Cux1</i>   | 5.0          | 0.0         | 11.11304             | 0.011  | 0.52                  | 0.84              | 35639445  | 35639901  |
| <i>Runx1</i>  | 3.1          | 1.0         | 1.589259             | 0.002  | 0.65                  | 0.19              | 146939482 | 146939629 |
| <i>Gli3</i>   | 5.1          | 3.1         | 0.716708             | 0.003  | 0.44                  | 0.88              | 41410654  | 41411108  |
| <i>Foxo1</i>  | 11.6         | 1.4         | 3.049298             | 0.000  | 0.40                  | 0.72              | 64694258  | 64694508  |
| <i>Fzd1</i>   | 18.1         | 5.8         | 1.64596              | 0.004  | 0.33                  | 0.68              | 111902257 | 111902552 |
| <i>Notch1</i> | 18.1         | 6.3         | 1.528654             | 0.003  | 0.71                  | 0.86              | 103351558 | 103351699 |
| <i>Notch3</i> | 10.6         | 5.0         | 1.091672             | 0.017  | 0.51                  | 0.87              | 100777692 | 100777863 |
| <i>Smad7</i>  | 7.6          | 1.4         | 2.415998             | 0.005  | 0.36                  | 0.80              | 48827145  | 48827355  |
| <i>Jag1</i>   | 33.5         | 8.3         | 2.015405             | 0.001  | 0.33                  | 0.79              | 3752377   | 3752803   |
| <i>Rora</i>   | 23.5         | 4.2         | 2.489794             | 0.003  | 0.55                  | 0.87              | 53503152  | 53503499  |
| <i>Egfr</i>   | 30.8         | 13.0        | 1.237949             | 0.004  | 0.32                  | 0.68              | 842607    | 843297    |
| <i>Fgfr2</i>  | 3.2          | 0.9         | 1.783451             | 0.007  | 0.44                  | 0.70              | 10433298  | 10433462  |
| <i>Krt40</i>  | 28.6         | 0.1         | 8.433506             | 0.000  | 0.39                  | 0.79              | 40830782  | 40831215  |
| <i>Krt14</i>  | 1321.9       | 6.6         | 7.638095             | 0.000  | 0.66                  | 0.90              | 41440140  | 41440345  |

896

897

898

899

900

901

902

903

904

905

906

907

908

909

910

911

912

913

914

915 **Figures**

916 **Fig 1**

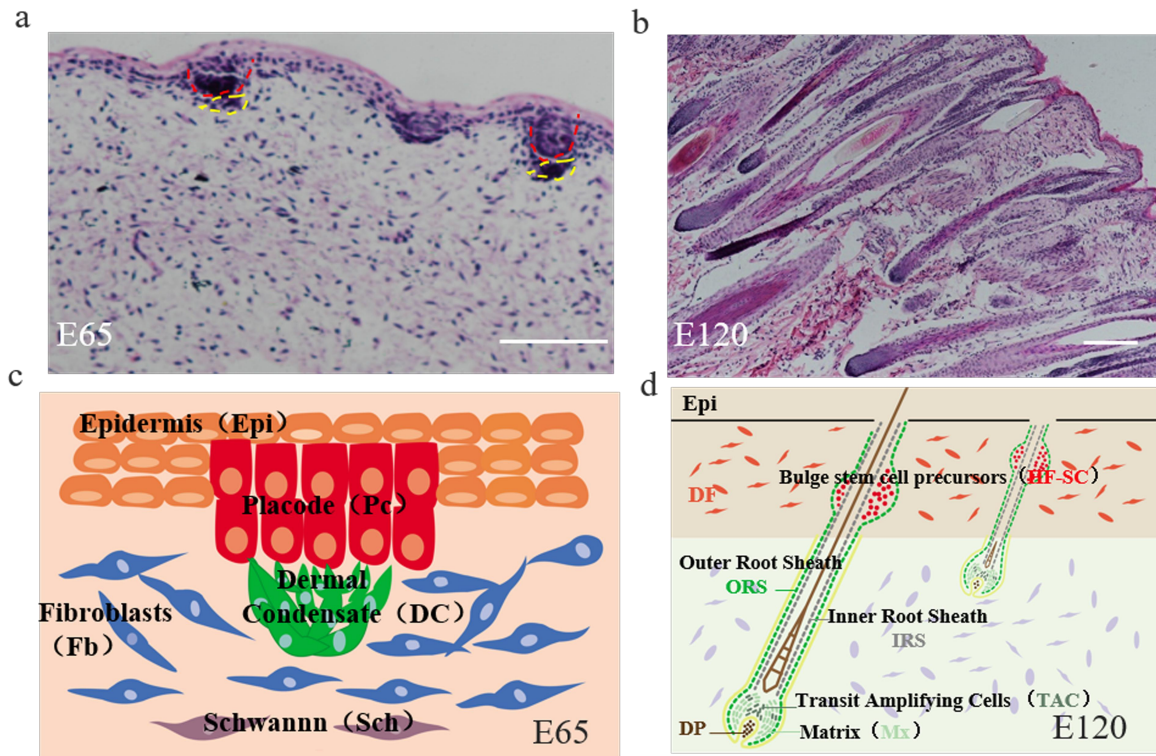

917 **Fig 1.** The skin morphology of E65 and E120 during hair morphogenesis in Shanbei  
918 White Cashmere goat. (a-b) The skin morphology of E65 and E120 during hair  
919 morphogenesis detected by H&E staining (Scale bars, 50  $\mu$ m); (c-d) Schematic  
920 diagram of the skin morphology in E65 and E120 in Shanbei White Cashmere goat.  
921 Red dashed lines indicate epidermal hair follicle placode, Yellow dashed lines  
922 indicate dermal condensate.  
923

924  
925  
926  
927  
928  
929  
930  
931  
932  
933  
934  
935  
936  
937  
938  
939  
940  
941

942

**Fig 2**

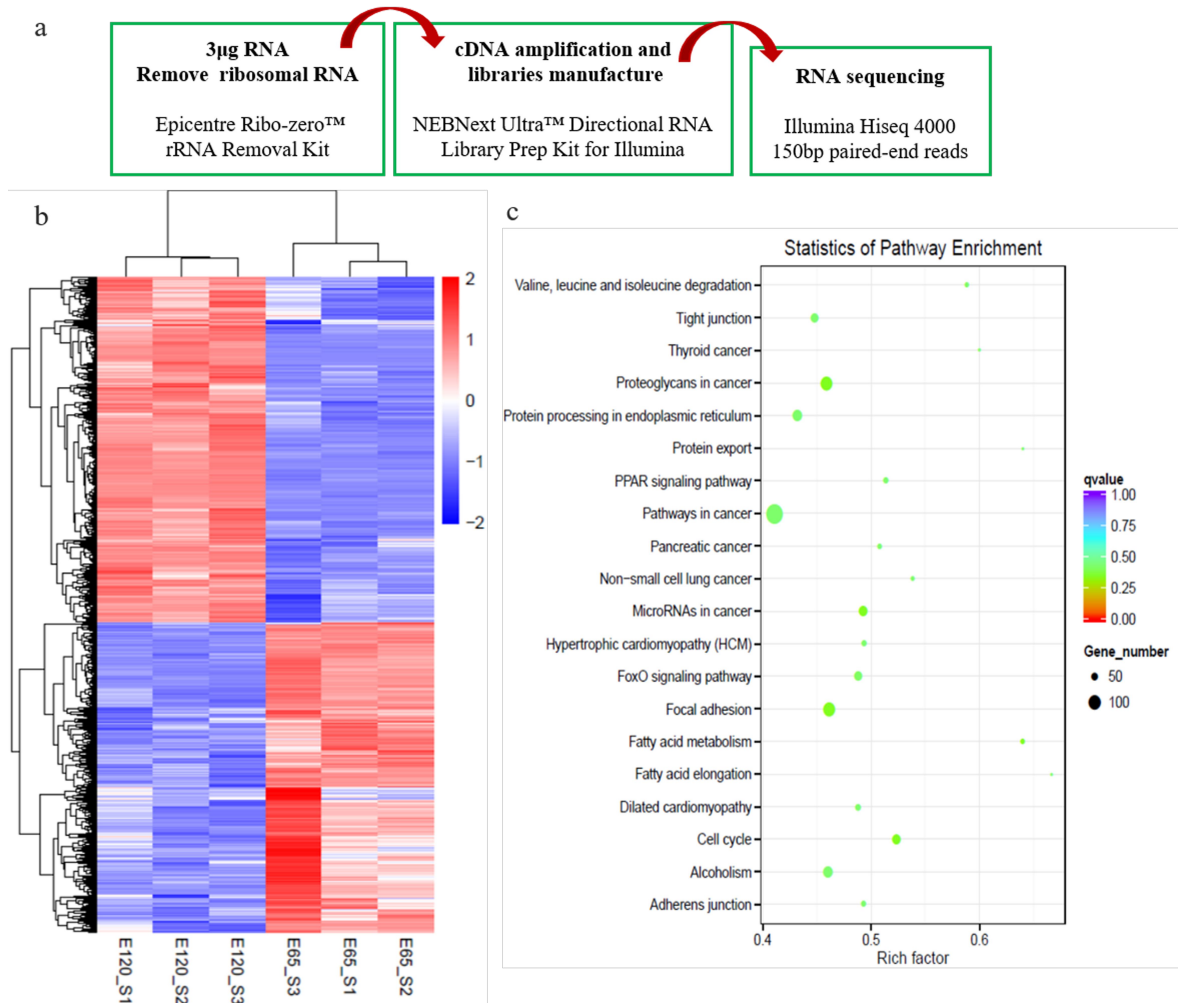

943

944

945

946

947

948

949

950

951

952

953

954

955

956

957

958

959

960

961

962

963

**Fig 2.** Critical signals and genes for hair follicle induction and differentiation stages revealed by RNA-sequencing and subsequent molecular verification. **(a)** Workflow of sample preparation for RNA sequencing. **(b)** The heatmap of DEGs between E65 and E120. **(c)** KEGG analysis of DEGs between E65 and E120.

964  
965

### Fig 3

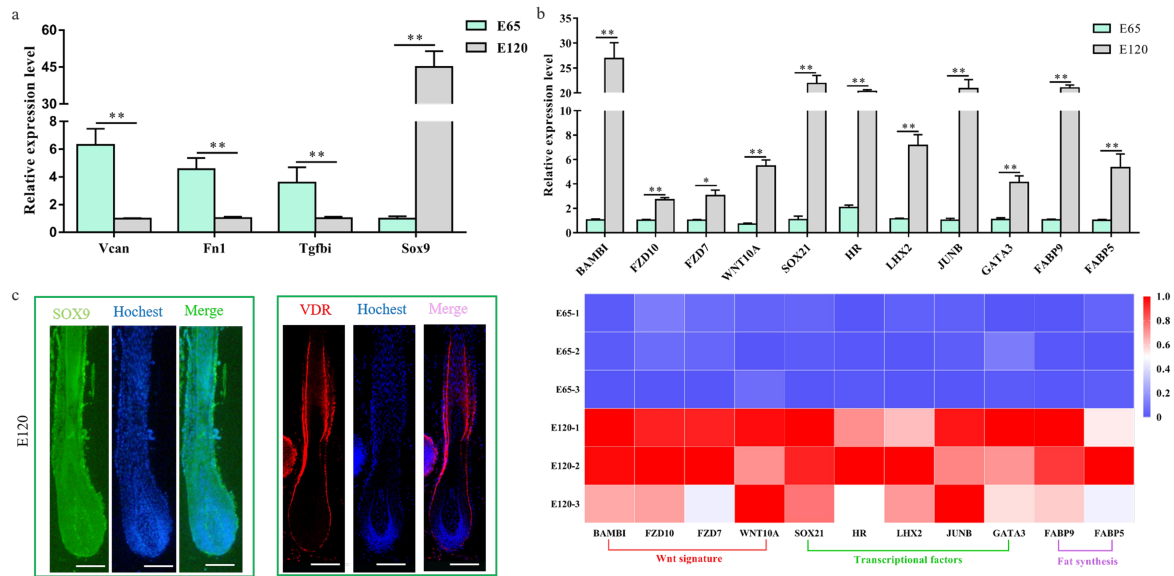

966  
967  
968  
969  
970  
971  
972  
973  
974  
975  
976  
977

**Fig 3.** Verification of differentially expressed genes of hair follicle induction and differentiation (a) qRT-PCR of four randomly selected genes between E65 and E120 in cashmere goat. (b) qRT-PCR confirmed the expression of partial DEGs associated with hair follicle development between E65 and E120 in cashmere goat. And the heatmap was based on the results of qRT-PCR and standardized by Min-max normalization method. (c) IF of Sox9 and Vdr at E120 of cashmere goat. Green/Red fluorescence indicated the expression pattern of interest protein. Nucleus was stained with Hoechst in blue. Scale bars, 50  $\mu$ m.

### Fig 4

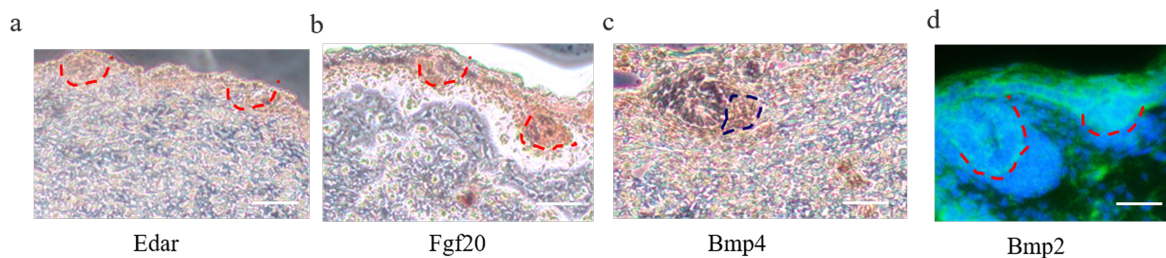

978  
979  
980  
981  
982  
983  
984  
985  
986  
987  
988  
989  
990  
991

**Fig 4.** IHC verification of Pc and DC cell-type-specific gene on skin tissues. (a-d) Edar, Bmp2 and Fgf20 specifically expressed in Pc, while Bmp4 specifically expressed in DC. Brown indicates the expression of interest protein. Green fluorescence indicates the expression pattern of Bmp2, nucleus was stained with Hoechst in blue. Red dashed lines indicate epidermal hair follicle placode, blue dashed lines indicate dermal condensate. Scale bars, 50  $\mu$ m.

992 **Fig 5**

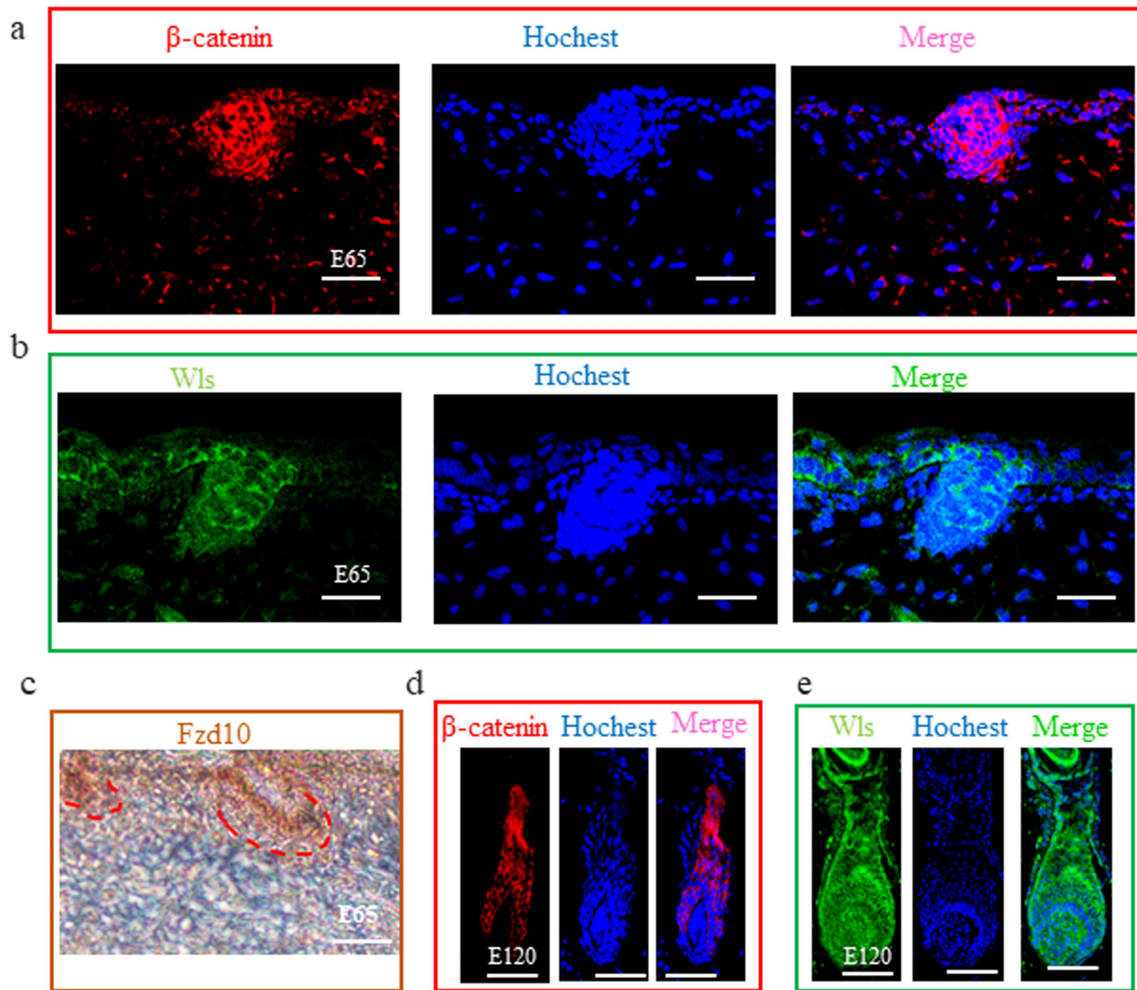

993  
994  
995  
996  
997  
998  
999  
1000  
1001  
1002  
1003  
1004  
1005  
1006  
1007  
1008  
1009  
1010  
1011

**Fig 5.** The expression of  $\beta$ -catenin, Wls and Fzd10 at hair follicle induction and differentiation stages were detected by IHC. (a-c) The expression of  $\beta$ -catenin, Wls and Fzd10 at E65 stage. (d-e) The expression of  $\beta$ -catenin and Wls at E120 stage. Green/Red fluorescence indicated the expression pattern of interest protein. Nucleus was stained with Hoechst in blue. Brown indicates the expression of Fzd10 protein. Red dashed lines indicate epidermal hair follicle placode. Scale bars, 50  $\mu$ m.



1012 **Fig 6**

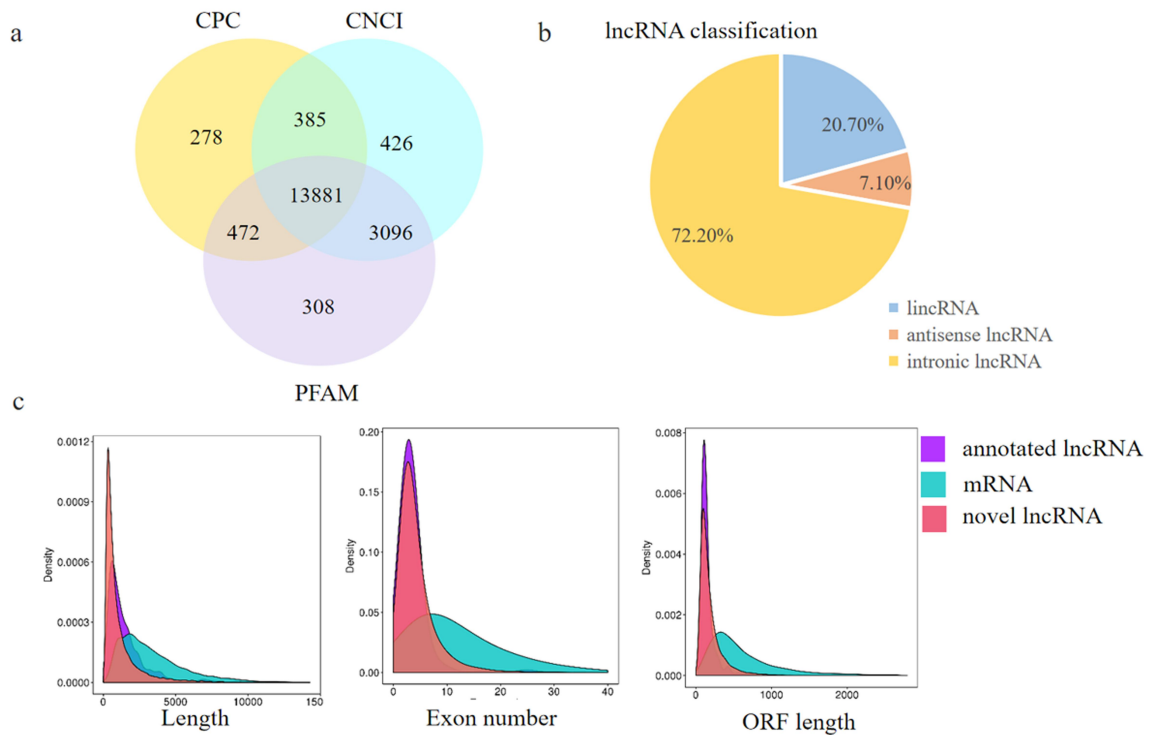

1013

1014

1015

1016

1017

1018

**Fig 6.** Identification and characterization of lncRNAs in E65 and E120 skin tissues of *Capra hircus*. **(a)** Screening of the candidate lncRNAs in skin transcriptome by CPC, CNCI and PFAM. **(b)** The classification of lncRNAs. **(c)** Distribution of transcript lengths, exon number and ORF length in the lncRNAs and protein-coding transcripts.

1019

1020

**Fig 7**

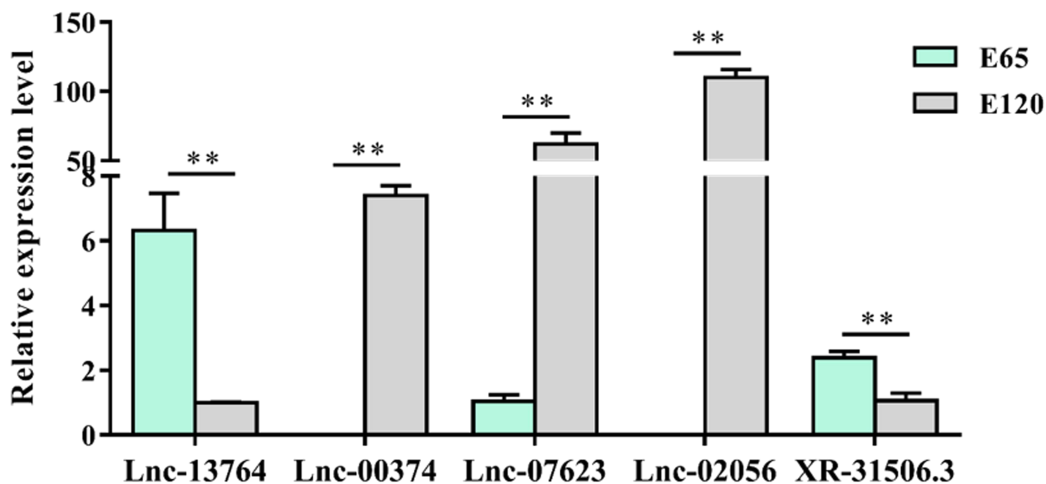

1021

1022

1023

1024

1025

**Fig 7.** The lncRNA expression patterns in different stages.  $\beta$ -actin was used as reference genes.

1026 **Fig 8**

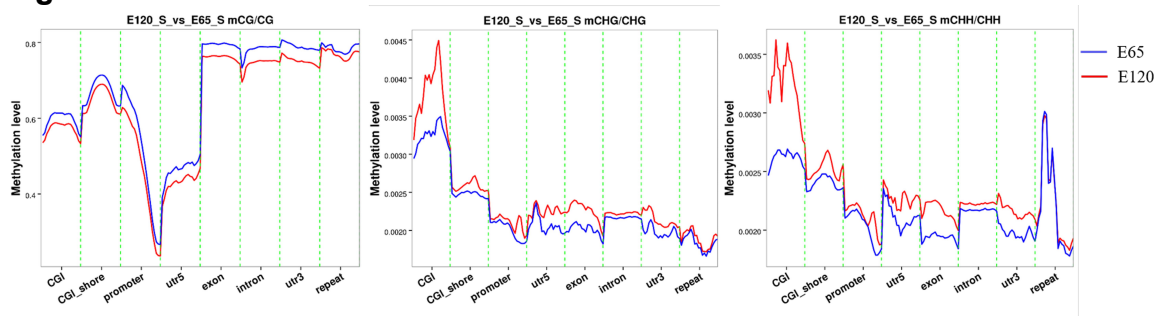

1027  
1028  
1029  
1030  
1031

**Fig 8.** The methylation level in gene different regions for mCG, mCHH and mCHG. At the genome-wide scale, the E65 samples exhibited a higher CG methylation status in all regions. A marked hypo-methylation was observed in the regions surrounding transcription start site.

1032  
1033

**Fig 9**

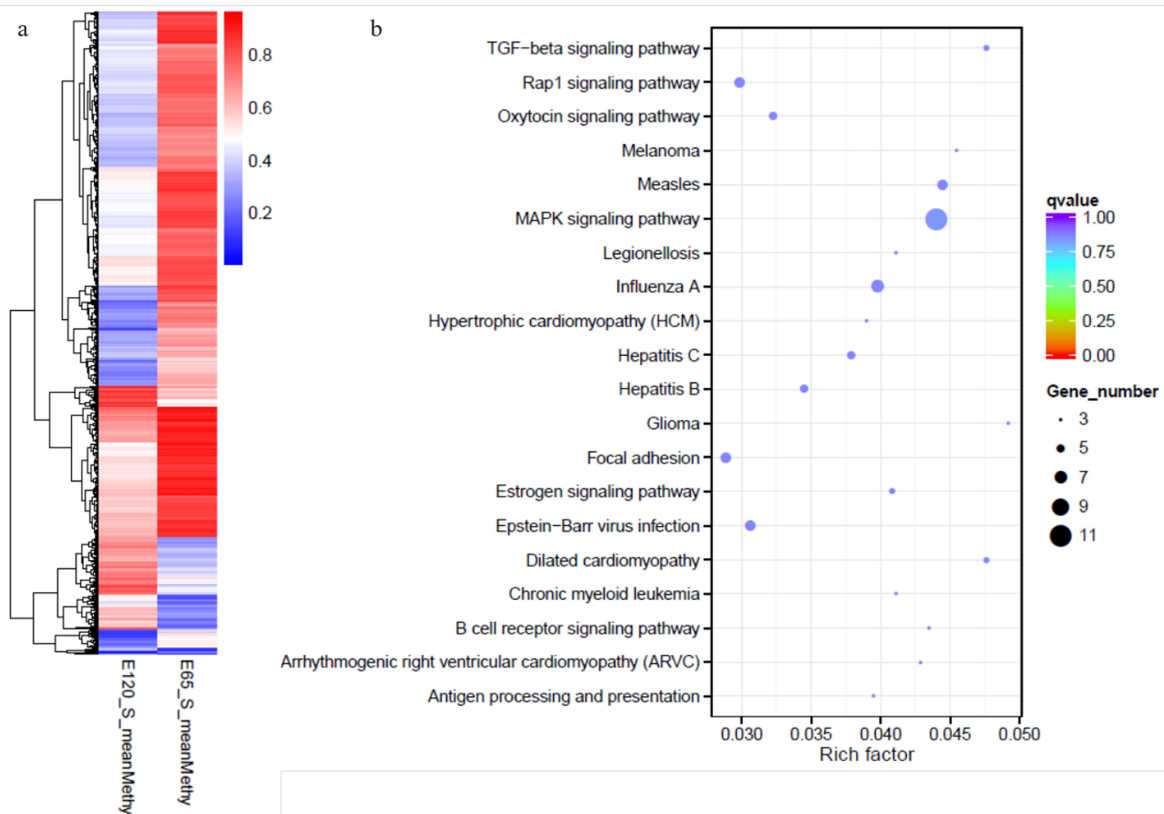

1034  
1035  
1036  
1037  
1038  
1039  
1040  
1041  
1042  
1043  
1044

**Fig 9.** The heat map and KEGG analysis of genes with differential methylation between E65 and E120. (a) The heat map of the genes with differential methylation between E65 and E120. (b) The KEGG analysis of the genes with differential methylation between E65 and E120.

1045 **Fig 10**

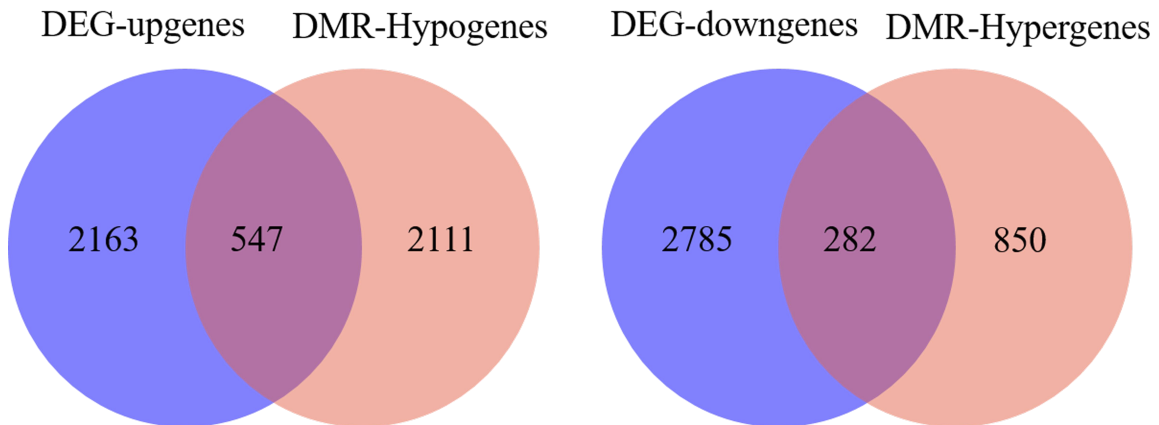

1046

1047 **Fig 10.** The Venn diagram between the differentially methylated genes and  
1048 differentially expressed genes between E65 and E120. A. hypo-methylation genes  
1049 with higher expression B. hyper-methylation genes with lower expression.

1050

1051 **Fig 11**

1052

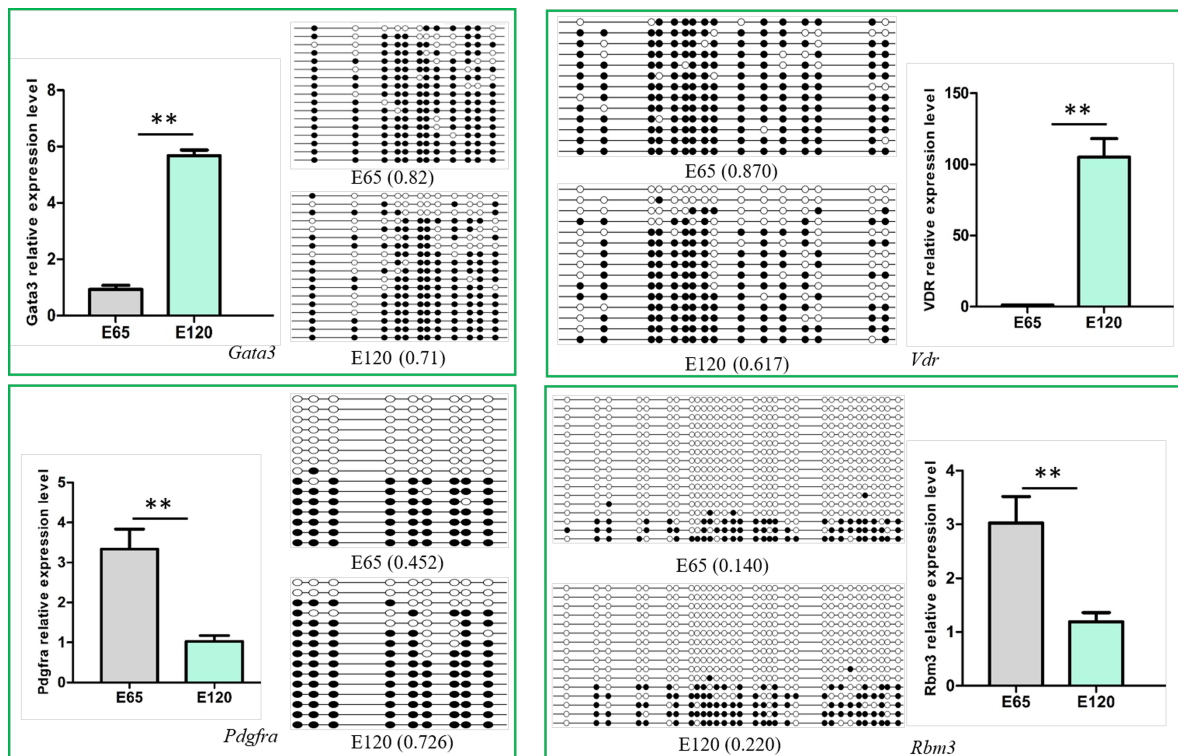

1053

1054 **Fig 11.** Verification of the differentially methylated genes and their expression.  
1055  $\beta$ -actin as a reference gene for quantitative gene expression. The data was  
1056 expressed as the mean  $\pm$  SE (n=3). \*\* P<0.01.

1057

1058

1059

1060

1061

**Fig 12**

DNA methylation

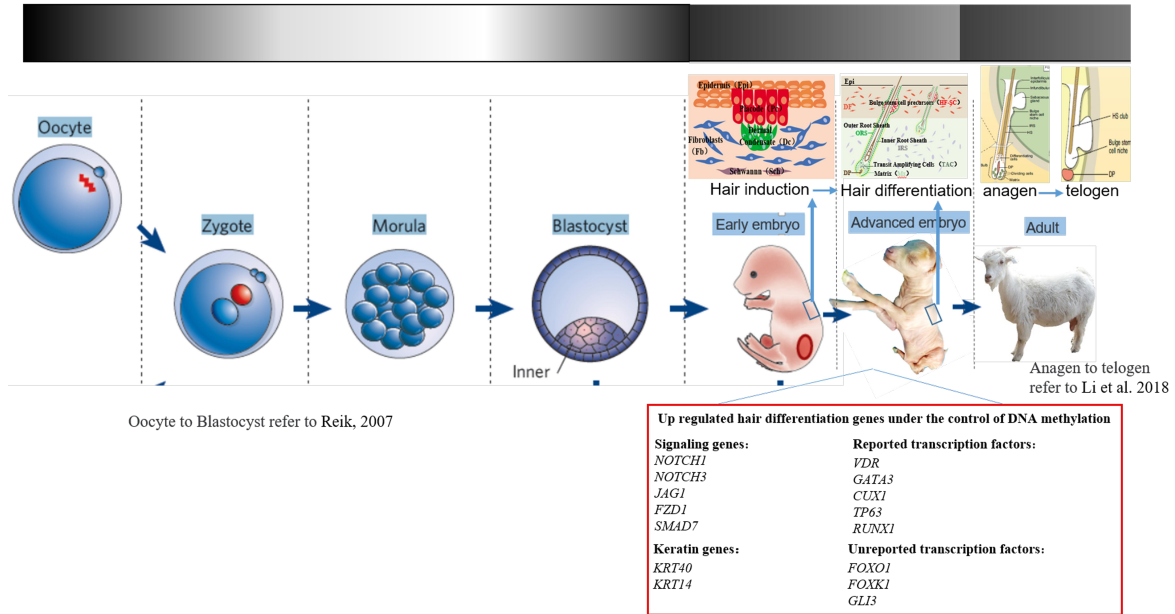

1062

1063

1064

1065

**Fig 12.** The dynamic changes of DNA methylation from oocyte to adult in cashmere goat
